# Supplementary material for: Non-operative management after chemoradiotherapy plus consolidation or sandwich (induction with bevacizumab and consolidation) chemotherapy in patients with locally advanced rectal cancer: a multicentre, randomised phase II trial (NOMINATE trial)
Source: PubMed Central journal article supplement — BMJ Open. 2022 Mar 18;12(3):e055140. doi: 10.1136/bmjopen-2021-055140 (PMC8935173; doi:10.1136/bmjopen-2021-055140), 2022-03-18
Supplement: bmjopen-2021-055140.draft_revisions.pdf [file bmjopen-2021-055140.draft_revisions.pdf]

# BMJ Open

BMJ Open is committed to open peer review. As part of this commitment we make the peer review history of every article we publish publicly available.

When an article is published we post the peer reviewers' comments and the authors' responses online. We also post the versions of the paper that were used during peer review. These are the versions that the peer review comments apply to.

The versions of the paper that follow are the versions that were submitted during the peer review process. They are not the versions of record or the final published versions. They should not be cited or distributed as the published version of this manuscript.

BMJ Open is an open access journal and the full, final, typeset and author-corrected version of record of the manuscript is available on our site with no access controls, subscription charges or pay-per-view fees (<http://bmjopen.bmj.com>).

If you have any questions on BMJ Open's open peer review process please email [info.bmjopen@bmj.com](mailto:info.bmjopen@bmj.com)

# BMJ Open

**Study Protocol: Non-operative management after chemoradiotherapy plus consolidation or sandwich (induction with bevacizumab and consolidation) chemotherapy in patients with locally advanced rectal cancer: A multicentre, randomised phase II trial (NOMINATE trial)**

|                               |                                                                                                                                                                                                                                                                                                                                                                                                                                                                                                                                                                                                                                                                                                                                                                                                                                                                                                                                                                                                                                                                                                                                                                                                                                                                                                                                                                                                                                                                                                                                                                                                                                                                                                                                                                                                                                                                                                |
|-------------------------------|------------------------------------------------------------------------------------------------------------------------------------------------------------------------------------------------------------------------------------------------------------------------------------------------------------------------------------------------------------------------------------------------------------------------------------------------------------------------------------------------------------------------------------------------------------------------------------------------------------------------------------------------------------------------------------------------------------------------------------------------------------------------------------------------------------------------------------------------------------------------------------------------------------------------------------------------------------------------------------------------------------------------------------------------------------------------------------------------------------------------------------------------------------------------------------------------------------------------------------------------------------------------------------------------------------------------------------------------------------------------------------------------------------------------------------------------------------------------------------------------------------------------------------------------------------------------------------------------------------------------------------------------------------------------------------------------------------------------------------------------------------------------------------------------------------------------------------------------------------------------------------------------|
| Journal:                      | <i>BMJ Open</i>                                                                                                                                                                                                                                                                                                                                                                                                                                                                                                                                                                                                                                                                                                                                                                                                                                                                                                                                                                                                                                                                                                                                                                                                                                                                                                                                                                                                                                                                                                                                                                                                                                                                                                                                                                                                                                                                                |
| Manuscript ID                 | bmjopen-2021-055140                                                                                                                                                                                                                                                                                                                                                                                                                                                                                                                                                                                                                                                                                                                                                                                                                                                                                                                                                                                                                                                                                                                                                                                                                                                                                                                                                                                                                                                                                                                                                                                                                                                                                                                                                                                                                                                                            |
| Article Type:                 | Protocol                                                                                                                                                                                                                                                                                                                                                                                                                                                                                                                                                                                                                                                                                                                                                                                                                                                                                                                                                                                                                                                                                                                                                                                                                                                                                                                                                                                                                                                                                                                                                                                                                                                                                                                                                                                                                                                                                       |
| Date Submitted by the Author: | 03-Jul-2021                                                                                                                                                                                                                                                                                                                                                                                                                                                                                                                                                                                                                                                                                                                                                                                                                                                                                                                                                                                                                                                                                                                                                                                                                                                                                                                                                                                                                                                                                                                                                                                                                                                                                                                                                                                                                                                                                    |
| Complete List of Authors:     | <p>Akiyoshi, Takashi; Cancer Institute Hospital Department of Gastroenterological Surgery<br/>         Taguchi, Senzo; Cancer Institute Hospital, Department of Radiation Oncology<br/>         Chino, Akiko; Cancer Institute Hospital, Department of Gastroenterology<br/>         Hiratsuka, Makiko; Cancer Institute Hospital, Department of Diagnostic Imaging<br/>         Tominaga, Tetsuro; Nagasaki University, Department of Surgical Oncology<br/>         Nonaka, Takashi; Nagasaki University, Department of Surgical Oncology<br/>         Toda, Shigeo; Toranomon Hospital, Department of Gastroenterological Surgery<br/>         Matoba, Shuichiro; Toranomon Hospital, Department of Gastroenterological Surgery<br/>         Matsui, Shimpei; Keio University School of Medicine Graduate School of Medicine, Department of Surgery<br/>         Mukai, Toshiki; Cancer Institute Hospital Department of Gastroenterological Surgery<br/>         Hiyoshi, Yukiharu; Cancer Institute Hospital Department of Gastroenterological Surgery<br/>         Yamaguchi, Tomohiro; Cancer Institute Hospital Department of Gastroenterological Surgery<br/>         Ueno, Masashi; Toranomon Hospital, Department of Gastroenterological Surgery<br/>         Kuroyanagi, Hiroya; Toranomon Hospital, Department of Gastroenterological Surgery<br/>         Fukunaga, Yosuke; Cancer Institute Hospital Department of Gastroenterological Surgery<br/>         Ishizuka, Naoki; Cancer Institute Hospital, Department of Clinical Trial Planning and Management<br/>         Konishi, Tsuyoshi; The University of Texas MD Anderson Cancer Center, Department of Colon and Rectal Surgery<br/>         Shinozaki, Eiji; Cancer Institute Hospital of JFCR<br/>         Okabayashi, Koji ; Keio University School of Medicine Graduate School of Medicine Department of Surgery</p> |

1  
2  
3  
4  
5  
6  
7  
8  
9  
10  
11  
12  
13  
14  
15  
16  
17  
18  
19  
20  
21  
22  
23  
24  
25  
26  
27  
28  
29  
30  
31  
32  
33  
34  
35  
36  
37  
38  
39  
40  
41  
42  
43  
44  
45  
46  
47  
48  
49  
50  
51  
52  
53  
54  
55  
56  
57  
58  
59  
60

|           |                                                                                                                                        |
|-----------|----------------------------------------------------------------------------------------------------------------------------------------|
|           | Nagasaki, Toshiya; Cancer Institute Hospital Department of Gastroenterological Surgery<br>Yamaguchi, Kensei; Cancer Institute Hospital |
| Keywords: | CHEMOTHERAPY, RADIOTHERAPY, Colorectal surgery < SURGERY                                                                               |
|           |                                                                                                                                        |

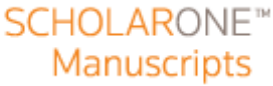

Akiyoshi, 1

Protocol

**Study Protocol: Non-operative management after chemoradiotherapy plus consolidation or sandwich (induction with bevacizumab and consolidation) chemotherapy in patients with locally advanced rectal cancer: A multicentre, randomised phase II trial (NOMINATE trial)**

**Takashi Akiyoshi<sup>1</sup>, Eiji Shinozaki<sup>2</sup>, Senzo Taguchi<sup>3</sup>, Akiko Chino<sup>4</sup>, Makiko Hiratsuka<sup>5</sup>, Tetsuro Tominaga<sup>6</sup>, Takashi Nonaka<sup>6</sup>, Shigeo Toda<sup>7</sup>, Shuichiro Matoba<sup>7</sup>, Shimpei Matsui<sup>8</sup>, Koji Okabayashi<sup>8</sup>, Toshiki Mukai<sup>1</sup>, Yukiharu Hiyoshi<sup>1</sup>, Tomohiro Yamaguchi<sup>1</sup>, Toshiya Nagasaki<sup>1</sup>, Kensei Yamaguchi<sup>2</sup>, Masashi Ueno<sup>7</sup>, Hiroya Kuroyanagi<sup>7</sup>, Yosuke Fukunaga<sup>1</sup>, Naoki Ishizuka<sup>9</sup>, Tsuyoshi Konishi<sup>10</sup>, for NOMINATE Collaborative Group**

<sup>1</sup>Gastroenterological Centre, Department of Gastroenterological Surgery, Cancer Institute Hospital, Japanese Foundation for Cancer Research, Tokyo, Japan

<sup>2</sup>Gastroenterological Centre, Department of Gastroenterological Chemotherapy, Cancer Institute Hospital, Japanese Foundation for Cancer Research, Tokyo, Japan

<sup>3</sup>Department of Radiation Oncology, Cancer Institute Hospital, Japanese Foundation for Cancer Research, Tokyo, Japan.

<sup>4</sup>Gastroenterological Centre, Department of Gastroenterology, Cancer Institute Hospital of the Japanese Foundation for Cancer Research, Tokyo, Japan.

<sup>5</sup>Department of Diagnostic Imaging, Cancer Institute Hospital, Japanese Foundation for Cancer Research, Tokyo, Japan.

<sup>6</sup>Department of Surgical Oncology, Nagasaki University Graduate School of Biomedical

1  
2  
3  
4 Science, Nagasaki, Japan.  
5

6 <sup>7</sup>Department of Gastroenterological Surgery, Toranomon Hospital, Tokyo, Japan.  
7

8 <sup>8</sup>Department of Surgery, Keio University School of Medicine, Tokyo, Japan  
9

10 <sup>9</sup>Department of Clinical Trial Planning and Management, Cancer Institute Hospital, Japanese  
11  
12 Foundation for Cancer Research, Tokyo, Japan.  
13  
14

15 <sup>10</sup>Department of Colon and Rectal Surgery, The University of Texas M.D. Anderson Cancer  
16  
17 Centre, Houston, Texas, USA  
18  
19

20  
21  
22  
23 **Correspondence to:** T. Akiyoshi, Gastroenterological Centre, Department of  
24  
25 Gastroenterological Surgery, Cancer Institute Hospital, Japanese Foundation for Cancer  
26  
27 Research, 3-8-31 Ariake, Koto-ku, Tokyo 135-8550, Japan  
28  
29

30 Phone: +81-03-3520-0111; fax: +81-03-3520-0141; e-mail: [takashi.akiyoshi@jfcrr.or.jp](mailto:takashi.akiyoshi@jfcrr.or.jp)  
31  
32

33  
34  
35 **Word count:** 2,461 words  
36  
37  
38  
39  
40  
41  
42  
43  
44  
45  
46  
47  
48  
49  
50  
51  
52  
53  
54  
55  
56  
57  
58  
59  
60

## ABSTRACT

**Introduction:** Total mesorectal excision (TME) and postoperative adjuvant chemotherapy following neoadjuvant chemoradiotherapy (CRT) is the standard treatment for locally advanced rectal cancer (LARC). However, neoadjuvant CRT has no recognized impact on reducing distant recurrence, and patients suffer from a long-lasting impairment in quality of life (QOL) associated with TME. Total neoadjuvant therapy (TNT) is an alternative approach that could reduce distant metastases and increase the proportion of patients who could safely undergo non-operative management (NOM). This study is designed to compare two TNT regimens in the context of NOM for selecting a more optimal regimen for patients with LARC.

**Methods and analysis:** NOMINATE trial is a prospective, multicentre, randomised phase II selection design study for patients with clinical stage II or III (T3-T4Nany) LARC  $\leq 5$  cm from the anal verge or for those who are candidates for abdominoperineal resection or intersphincteric resection prior to neoadjuvant therapy. Patients will be randomised to either Arm A consisting of CRT (50.4 Gy with capecitabine) followed by consolidation chemotherapy (6 courses of CapeOx), or Arm B consisting of induction chemotherapy (3 courses of CapeOx plus bevacizumab) followed by CRT and consolidation chemotherapy (3 courses of CapeOx). In the case of clinical complete response (cCR) or near cCR, patients will progress to NOM. The primary endpoint is the proportion of patients achieving pathological CR or cCR  $\geq 2$  years, defined as the absence of local regrowth within 2 years after the start of NOM among eligible patients. Allowing for a drop-out rate of 10%, 66 patients (33 per arm) from 5 institutions will be accrued.

**Ethics and dissemination:** The study protocol was approved by Wakayama Medical University Certified Review Board in December 2020. Trial results will be published in peer-reviewed international journals and on the jRCT website.

1  
2  
3  
4 **Trial registration number** jRCTs051200121  
5  
6  
7  
8  
9  
10  
11

12 **Strength and limitations of this study**  
13

- 14 ▶ This phase II study is the first study of total neoadjuvant therapy and non-operative  
15 management to compare the efficacy and safety of consolidation chemotherapy to  
16 sandwich chemotherapy using bevacizumab combined with capecitabine-based  
17 chemoradiotherapy.  
18  
19 ▶ The assessment of a clinical complete response and near clinical complete response will  
20 be performed based on pre-defined response criteria, determined at a multi-centre, multi-  
21 disciplinary team meeting.  
22  
23 ▶ Confirmatory conclusions cannot be drawn from a randomised phase II study.  
24  
25  
26  
27  
28  
29  
30  
31  
32  
33  
34  
35  
36  
37  
38  
39  
40  
41  
42  
43  
44  
45  
46  
47  
48  
49  
50  
51  
52  
53  
54  
55  
56  
57  
58  
59  
60

## INTRODUCTION

The current standard treatment for locally advanced rectal cancer (LARC) is neoadjuvant chemoradiotherapy (CRT), total mesorectal excision (TME), and postoperative adjuvant chemotherapy. This multimodality treatment has significantly reduced local recurrence rates to <10%. However, neoadjuvant CRT has failed to reduce distant recurrence or improve disease-free survival (DFS) and overall survival (OS). Despite the adoption of adjuvant postoperative chemotherapy, distant relapse occurs in about 30% of patients at 5 years. Postoperative adjuvant chemotherapy following neoadjuvant CRT has failed to show survival improvement, possibly due to poor compliance to chemotherapy, a longer interval between diagnosis and commencing chemotherapy, and the application of suboptimal regimens.<sup>1</sup> These limitations have led to the development of a total neoadjuvant therapy (TNT) approach, which delivers both radiotherapy and systemic chemotherapy preoperatively in an attempt to treat micrometastases earlier, increase adherence to systemic chemotherapy, and improve DFS. Two recent phase 3 randomised controlled trials investigating TNT (RAPIDO<sup>2</sup> and PRODIGE 23 trial<sup>3</sup>) showed better pathological complete response (pCR) rate and fewer distant metastases in the TNT arm as compared with the standard short-course radiotherapy or CRT arm.

Numerous studies have shown that patients with a pCR have more favourable long-term oncological outcomes in terms of distant and local control,<sup>4</sup> and this has raised the question as to whether TME can be avoided in patients with pCR. Because TME is associated with postoperative complications and late morbidity, such as bowel, sexual, and urinary dysfunction after TME,<sup>5,6</sup> avoiding TME may provide an opportunity to reduce the morbidity and the need of a permanent stoma, and improve quality of life (QOL). In 2004, Habr-Gama et al. for the first time proposed a watch-and-wait (WW) approach or non-operative



1  
2  
3  
4 management (NOM) for patients with a clinical complete response (cCR) after CRT.<sup>7</sup> Since  
5  
6 then, many studies—mainly retrospective observational studies—have shown NOM to be a  
7  
8 feasible option for patients with cCR after CRT.<sup>8,9</sup>  
9

10  
11 TNT has the potential to increase the proportion of patients achieving cCR and thus  
12  
13 being eligible for NOM;<sup>10</sup> however, randomised trial data evaluating the efficacy of NOM in  
14  
15 the context of TNT are lacking. OPRA was the first randomised phase II trial to address the  
16  
17 efficacy of TNT and NOM for patients with cCR or near cCR, with the primary endpoint of  
18  
19 3-year DFS, as compared with standard historical controls managed with CRT and TME  
20  
21 followed by adjuvant chemotherapy.<sup>11</sup> In the OPRA trial, 306 patients with LARC were  
22  
23 randomised to receive 4 months of 5-Fluorouracil (5-FU), Leucovorin and Oxaliplatin  
24  
25 (FOLFOX) or Capecitabine and Oxaliplatin (CapeOx) either before (induction  
26  
27 chemotherapy) or after (consolidation chemotherapy) CRT, followed by NOM for patients  
28  
29 with cCR or near cCR. Preliminary analyses demonstrated higher 3-year organ preservation  
30  
31 rates in the consolidation arm over the induction arm (59% vs 43%).<sup>12</sup> Similarly, in the  
32  
33 CAO/ARO/AIO-12 phase II trial, which randomly assigned patients to either induction or  
34  
35 consolidation chemotherapy (3 cycles of FOLFOX) before or after oxaliplatin-based CRT  
36  
37 followed by TME, demonstrated higher pCR rates in the consolidation arm as compared with  
38  
39 the induction arm (25% vs 17%).<sup>13</sup> Given these results, CRT followed by consolidation  
40  
41 chemotherapy may enable greater organ preservation, and should be preferentially  
42  
43 considered.<sup>14</sup>  
44  
45  
46  
47  
48  
49  
50  
51

52  
53 On the other hand, several studies have shown that the addition of anti-vascular  
54  
55 endothelial growth factor (VEGF) drugs before radiotherapy can enhance the radiation  
56  
57 response in LARC.<sup>15,16</sup> In the GEMCAD 1402 randomised phase II trial of induction  
58  
59 chemotherapy with 3 months of mFOLFOX6 with or without aflibercept followed by CRT  
60

Akiyoshi, 7

1  
2  
3  
4 and TME, patients in the aflibercept arm demonstrated a higher pCR rate than those without  
5  
6 aflibercept (22.6% vs 13.8%).<sup>17</sup> In a single-arm phase II trial of 3 months of mFOLFOX6  
7  
8 plus bevacizumab prior to CRT, we reported a pCR rate of 37% with favourable toxicity in a  
9  
10 series of 43 patients with poor-risk LARC.<sup>18</sup> Furthermore, a single-arm phase II study of  
11  
12 sandwich-like neoadjuvant therapy consisting of one cycle of induction FOLFOX with  
13  
14 bevacizumab, followed by CRT with three doses of bevacizumab, and one cycle of  
15  
16 consolidation FOLFOX, also reported a high pCR rate (39.1%).<sup>19</sup> Given these results, we  
17  
18 hypothesized that sandwich-like therapy of 3 cycles of induction chemotherapy with  
19  
20 bevacizumab and 3 cycles of consolidation chemotherapy could provide the advantages of  
21  
22 both induction (addressing micrometastatic disease earlier and enhanced CRT response by  
23  
24 bevacizumab) and consolidation (greater pCR or NOM rate) therapy arms.

25  
26 To this end, we designed this randomised phase II trial (NOMINATE trial) of TNT  
27  
28 and NOM to compare the efficacy and safety of consolidation chemotherapy (6 cycles of  
29  
30 CapeOx) to a sandwich chemotherapy regimen using bevacizumab (3 cycles of CapeOx plus  
31  
32 bevacizumab as induction chemotherapy and 3 cycles of CapeOx as consolidation  
33  
34 chemotherapy) combined with capecitabine-based CRT.  
35  
36  
37  
38  
39  
40  
41  
42  
43  
44  
45  
46  
47

## 48 **METHODS AND ANALYSIS**

### 49 **Study design**

50  
51 This is a prospective, multicentre, randomised phase II selection design study to compare two  
52  
53 TNT regimens in the context of NOM for selecting a more optimal regimen for patients with  
54  
55 LARC. The study flowchart is shown in Figure 1.  
56  
57  
58  
59  
60

### Primary endpoint

The primary endpoint is the proportion of patients achieving pCR or cCR  $\geq 2$  years among eligible patients. pCR is defined as no residual tumor cells in the surgical specimen. cCR  $\geq 2$  years is defined as the absence of local regrowth within 2 years after the start of NOM.

### Secondary endpoints

Secondary endpoints include cCR rate, near cCR rate, rate of NOM, OS, distant metastasis-free survival, locoregional failure-free survival, time to disease-related treatment failure, TME-free survival, permanent stoma-free survival, safety of the treatment, completion rate of the treatment, faecal incontinence according to Wexner score<sup>20</sup> and Low Anterior Resection Syndrome (LARS)-scale<sup>21</sup>, and quality of life according to European Organization for Research and Treatment of Cancer Quality of Life Questionnaire (EORTC QLQ) - C30<sup>22</sup> and CR29<sup>23</sup>. Locoregional failure includes progressive unresectable disease, local R2 resection, and intrapelvic recurrence after TME. Local regrowth after NOM is not considered as locoregional failure when followed by an R0/R1 resection. Disease-related treatment failure is defined as the first occurrence of locoregional failure, distant metastasis, a new primary colorectal cancer, or treatment-related death.<sup>2</sup> In patients managed by TME, surgical morbidity, R0 resection rate, pathological stage, Dworak tumour regression grade<sup>24</sup> will also be assessed. In patients managed by NOM, local regrowth rate, time to local regrowth, salvage surgery rate in patients with local regrowth, surgical morbidity in salvage surgery, and R0 resection rate in salvage surgery will also be assessed. The grade of adverse events will be assessed according to Common Terminology Criteria for Adverse Events (CTCAE) V.5.0.

**Eligibility criteria****Inclusion criteria**

1. Histologically confirmed diagnosis of adenocarcinoma of the rectum.
2. Clinical stage II/III (cT3-4 cNany) rectal cancer  $\leq 5$  cm from the anal verge or patient is a candidate for abdominoperineal resection or intersphincteric resection prior to neoadjuvant therapy according to the primary surgeon.
3. Clinical stage II (cT3-4N0) or stage III (cT3-4N1-3) by MRI and CT.
4. ECOG PS 0 or 1.
5. Age  $\geq 20$  years.
6. Adequate organ functions within 28 days prior to entry: neutrophils  $\geq 1,500 /\text{mm}^3$ , platelets  $\geq 10 \times 10^4 /\text{mm}^3$ , haemoglobin  $\geq 9.0$  g/dL, total bilirubin  $\leq 2.0$  mg/dL, aspartate aminotransferase  $\leq 100$  IU/L, alanine aminotransferase  $\leq 100$  IU/L, serum creatinine  $\leq 1.5$  mg/dL or Ccr  $\geq 60$  mL/min/body, urine protein/creatinine  $< 1$ .
7. If there is bowel obstruction or strong stricture, stoma is constructed prior to neoadjuvant therapy.
8. Written informed consent is obtained.

**Exclusion criteria**

1. Patients with a history of a prior malignancy within the past 5 years, except for adequately treated cancer with 5-year relative survival rate  $\geq 95\%$ .
2. History of pelvic irradiation.
3. Administration contraindication of capecitabine, oxaliplatin, or bevacizumab.
4. Uncontrolled active infection.
5. Body temperature  $\geq 38$  °C at entry.

- 1
- 2
- 3
- 4 6. Possibly pregnant, pregnant, or nursing.
- 5
- 6 7. Patients with concurrent psychiatric condition or disease that would make them
- 7
- 8 inappropriate candidates for entry into this study in the investigator's judgement.
- 9
- 10
- 11 8. Patients with concurrent serious complication (heart failure, interstitial lung disease or
- 12
- 13 pulmonary fibrosis, uncontrolled diabetes, renal failure, liver failure, hypertension,
- 14
- 15 thrombotic disease, gastrointestinal fistula, among other similarly serious conditions).
- 16
- 17 9. History of operation  $\leq 4$  weeks ago or minor operation such as stoma construction  $\leq 2$
- 18
- 19 weeks ago.
- 20
- 21
- 22
- 23 10. Deficient in mismatch repair (dMMR), as determined by immunohistochemistry and/or
- 24
- 25 microsatellite instability testing using pre-treatment biopsy specimens.
- 26
- 27
- 28 11. Other conditions not suitable for this study in the investigator's judgement.
- 29
- 30
- 31
- 32

### 33 **Sample size calculation**

34 This study uses a "pick the winner" format proposed by Simon et al.<sup>22</sup> The expected baseline  
35 proportion of pCR or cCR  $\geq 2$  years is set at 25%. If the difference in response rate between  
36 the treatment arms is at least 10%, 30 patients per arm (total 60 patients) is necessary to select  
37 the better treatment with a probability of  $\geq 80\%$ . With consideration for dropouts of 10%, 33  
38 patients per arm (total 66 patients) will be necessary. If there are no differences in response  
39 rate between treatment arms, a better treatment will be chosen in terms of secondary  
40 endpoints.  
41  
42  
43  
44  
45  
46  
47  
48  
49  
50  
51

### 52 **Registration and randomization**

53 Patients are registered to the study after confirming the eligibility criteria and written  
54 informed consent is obtained. Patients are requested to fill out EORTC QLQ-C30, CR29, and  
55  
56  
57  
58  
59  
60

1  
2  
3  
4 a questionnaire about faecal incontinence (Wexner score and LARS scale) at registration.

5  
6 After registration, patients are randomly assigned at a 1:1 ratio to the consolidation arm (arm  
7  
8 A) or sandwich arm (arm B) using a minimization method balancing on institution, cT (cT3  
9 vs cT4), and cN (cN- vs cN+). Registration, randomization, and collection of patient  
10  
11 information will be performed using the Viedoc electronic data capture (EDC) system. Data  
12  
13 are anonymized using a unique patient identification number.  
14  
15  
16  
17  
18  
19  
20

### 21 **Treatment**

22  
23 Arm A consists of CRT (50.4 Gy in 28 fractions and capecitabine 825mg/m<sup>2</sup> bid, day 1-5, 8-  
24  
25 12, 15-19, 22-26, 29-33, 36-38) followed by consolidation chemotherapy (6 courses of  
26  
27 CapeOx: capecitabine 2000 mg/m<sup>2</sup>/day, days 1-14, oxaliplatin 130 mg/m<sup>2</sup>, day 1, Q3w). Arm  
28  
29 B consists of induction chemotherapy (3 courses of CapeOx plus bevacizumab: capecitabine  
30  
31 2000 mg/m<sup>2</sup>/day, days 1-14, oxaliplatin 130 mg/m<sup>2</sup>, day1, bevacizumab 7.5 mg/kg, day 1,  
32  
33 Q3w) followed by CRT (same as in Arm A) followed by consolidation chemotherapy (3  
34  
35 courses of CapeOx).  
36  
37  
38  
39  
40  
41  
42

### 43 **Response assessment**

44  
45 Interval evaluation will be performed twice: after the completion of CRT and after the  
46  
47 completion of 3 courses of consolidation chemotherapy in Arm A, and after the completion  
48  
49 of induction chemotherapy and after the completion of CRT in Arm B. Final response  
50  
51 assessment will be performed after the completion of all neoadjuvant treatments. In the case  
52  
53 of cCR or near cCR, patients will progress to NOM, but TME is also permitted if patients  
54  
55 hope to undergo radical surgery. In the case of non-CR, patients will progress to TME.  
56  
57  
58  
59  
60 Criteria for response assessment are shown in Table 1.<sup>11,25-28</sup> Final response assessment

1  
2  
3  
4 involves a combination of digital rectal examination, endoscopy, and MRI, and will be  
5  
6 discussed at online multidisciplinary-team meetings attended by the principal investigator  
7  
8 (PI) and the local investigators.  
9

### 10 11 12 13 **Follow-up**

14  
15  
16 Patients treated with TME will be followed with measurements of serum carcinoembryonic  
17  
18 antigen (CEA) and carbohydrate (CA) 19-9 and will be subjected to chest/abdomen/pelvis CT  
19  
20 scan every 6 months for 5 years. Patients treated with NOM will be followed every 3 months  
21  
22 for the first 2 years and every 6 months thereafter, as shown in Table 2. In the case of near  
23  
24 cCR, patients will be followed every 6-8 weeks for the first 6 months. Salvage TME will be  
25  
26 recommended for patients with local regrowth after NOM; if the patient refuses TME, local  
27  
28 resection will also be acceptable. If a patient refuses surgical resection of local regrowth, it is  
29  
30 considered as locoregional failure.  
31  
32  
33  
34  
35  
36  
37

### 38 **Statistical analysis plan**

39  
40 The primary analysis will be conducted when 3 years have passed since patient accrual  
41  
42 completion. All analyses are based on descriptive data without testing because of the study  
43  
44 design. The proportions at the primary endpoint will be estimated using an Clopper-Pearson  
45  
46 method for binomial response. The proportions among registered patients or patients who  
47  
48 complete the protocol treatment will also be calculated as a reference. An analysis of  
49  
50 secondary endpoints will also be performed to complement the results at the primary  
51  
52 endpoint, but adjustment of multiplicity will not be performed due to their exploratory nature.  
53  
54  
55  
56  
57 Kaplan–Meier method will be used to estimate OS, with 95% CIs calculated by Greenwood's  
58  
59 formula. Univariate Cox regression will be used to estimate HRs with 95% CIs associated  
60

1  
2  
3  
4 with treatment arms. For endpoints with competing risk, such as distant metastasis-free  
5  
6 survival, locoregional failure-free survival and an estimation of HRs will be performed using  
7  
8 Fine and Grey models. The final analysis will be conducted when 6 years have passed since  
9  
10 patient accrual completion.  
11  
12  
13  
14  
15

### 16 **Interim analysis and monitoring**

17  
18 Interim analysis is planned for possible early trial termination to claim futility. In Simon's  
19  
20 optimal two-stage design,<sup>29</sup> when the null hypothesis is a pCR or cCR/near cCR rate of 15%  
21  
22 versus the alternative of 30% for each arm, and power and one-sided alpha are set at 80% and  
23  
24 5%, respectively, 19 subjects will be accrued in the first stage. If there are 3 or fewer  
25  
26 responders within these 19 subjects, enrolment in that arm will be stopped. If the number of  
27  
28 treatment-related deaths reach two for each arm, the registration will be suspended until Data  
29  
30 and Safety Monitoring approve the continuation of the trial. The Data Centre (Clinical  
31  
32 Research and Medical Development Centre, Cancer Institute Hospital, Japanese Foundation  
33  
34 for Cancer Research) will perform central monitoring every 6 months and monitoring reports  
35  
36 will be submitted to the Data and Safety Monitoring Committee.  
37  
38  
39  
40  
41  
42  
43  
44

### 45 **Translational research**

46  
47 Accompanying translational research about the molecular determinants of response to TNT  
48  
49 and molecular predictors of successful organ preservation is planned. The specific study  
50  
51 protocol for correlative translational research to the NOMINATE trial has been approved by  
52  
53 the intuitional review boards of all participating institutions. Tumour tissue and plasma will  
54  
55 be collected and stored at different time points after obtaining written informed consent from  
56  
57 patients. Next-generation sequencing, such as exome sequencing, RNA sequencing, and  
58  
59  
60



1  
2  
3  
4 circulating tumour DNA analysis, will be performed.  
5  
6  
7

### 8 **Ethics and dissemination**

9  
10 Wakayama Medical University Certified Review Board approved this study protocol in  
11  
12 December 2020. This trial will be performed in accordance with the Declaration of Helsinki  
13  
14 and Clinical Trials Act in Japan. Trial results of the primary and secondary endpoints will be  
15  
16 published in peer-reviewed international journals and on the jRCT website  
17  
18 (<https://jrct.niph.go.jp/>), as well as at international and national conferences.  
19  
20  
21  
22  
23  
24  
25

### 26 **Patient and public involvement**

27  
28 Patients or the public were not involved in the design, or conduct, or reporting, or  
29  
30 dissemination plans of this study.  
31  
32  
33  
34

35 **Contributors** TA, SE, TS, NI, TK developed the trial concept and wrote the protocol. All  
36  
37 authors contributed to refining the protocol and have read and approved the final  
38  
39 version.  
40  
41

42 **Funding** This trial receives no specific grant from any funding agency in the public,  
43  
44 commercial or not-for-profit sectors at present.  
45  
46

47 **Competing interests** KY reports honoraria from Chugai Co., Ltd.  
48  
49

50 **Patient consent for publication** Not required.  
51

52 **Ethics approval** Wakayama Medical University Certified Review Board (CRB5180004).  
53  
54  
55

56  
57 1. Carvalho C, Glynne-Jones R. Challenges behind proving efficacy of adjuvant  
58 chemotherapy after preoperative chemoradiation for rectal cancer. *Lancet Oncol* 2017; **18**:  
59 e354-e63.  
60

2. Bahadoer RR, Dijkstra EA, van Etten B, et al. Short-course radiotherapy followed by chemotherapy before total mesorectal excision (TME) versus preoperative chemoradiotherapy, TME, and optional adjuvant chemotherapy in locally advanced rectal cancer (RAPIDO): a randomised, open-label, phase 3 trial. *Lancet Oncol* 2021; **22**: 29-42.
3. Conroy T, Bosset JF, Etienne PL, et al. Neoadjuvant chemotherapy with FOLFIRINOX and preoperative chemoradiotherapy for patients with locally advanced rectal cancer (UNICANCER-PRODIGE 23): a multicentre, randomised, open-label, phase 3 trial. *Lancet Oncol* 2021; **22**: 702-15.
4. Maas M, Nelemans PJ, Valentini V, et al. Long-term outcome in patients with a pathological complete response after chemoradiation for rectal cancer: a pooled analysis of individual patient data. *Lancet Oncol* 2010; **11**: 835-44.
5. Matsubara N, Miyata H, Gotoh M, et al. Mortality after common rectal surgery in Japan: a study on low anterior resection from a newly established nationwide large-scale clinical database. *Dis Colon Rectum* 2014; **57**: 1075-81.
6. Honda M, Akiyoshi T, Noma H, et al. Patient-centered outcomes to decide treatment strategy for patients with low rectal cancer. *J Surg Oncol* 2016; **114**(5): 630-6.
7. Habr-Gama A, Perez RO, Nadalin W, et al. Operative versus nonoperative treatment for stage 0 distal rectal cancer following chemoradiation therapy: long-term results. *Ann Surg* 2004; **240**(4): 711-7; discussion 7-8.
8. van der Valk MJM, Hilling DE, Bastiaannet E, et al. Long-term outcomes of clinical complete responders after neoadjuvant treatment for rectal cancer in the International Watch & Wait Database (IWWD): an international multicentre registry study. *Lancet* 2018; **391**: 2537-45.
9. Renehan AG, Malcomson L, Emsley R, et al. Watch-and-wait approach versus surgical resection after chemoradiotherapy for patients with rectal cancer (the OnCoRe project): a propensity-score matched cohort analysis. *Lancet Oncol* 2016; **17**: 174-83.
10. Cercek A, Roxburgh CSD, Strombom P, et al. Adoption of Total Neoadjuvant Therapy for Locally Advanced Rectal Cancer. *JAMA Oncol* 2018; **4**: e180071.
11. Smith JJ, Chow OS, Gollub MJ, et al. Organ Preservation in Rectal Adenocarcinoma: a phase II randomized controlled trial evaluating 3-year disease-free survival in patients with locally advanced rectal cancer treated with chemoradiation plus induction or consolidation chemotherapy, and total mesorectal excision or nonoperative management. *BMC Cancer* 2015; **15**: 767.
12. Garcia-Aguilar J PS, Kim JK, Yuval JB, Thompson H, Verheij F, et al. Preliminary results of the organ preservation of rectal adenocarcinoma (OPRA) trial. *J Clin Oncol* 2020; **38**(15\_suppl):4008.
13. Fokas E, Allgäuer M, Polat B, et al. Randomized Phase II Trial of Chemoradiotherapy Plus Induction or Consolidation Chemotherapy as Total Neoadjuvant Therapy for Locally Advanced Rectal Cancer: CAO/ARO/AIO-12. *J Clin Oncol* 2019; **37**: 3212-22.
14. Shi DD, Mamon HJ. Playing With Dynamite? A Cautious Assessment of TNT. *J Clin Oncol* 2021; **39**(2): 103-6.
15. Zhou Y, Guo Z, Wu Z, et al. The efficacy and safety of adding bevacizumab in neoadjuvant therapy for locally advanced rectal cancer patients: A systematic review and meta-analysis. *Transl Oncol* 2021; **14**: 100964.
16. Zhong X, Wu Z, Gao P, et al. The efficacy of adding targeted agents to neoadjuvant therapy for locally advanced rectal cancer patients: a meta-analysis. *Cancer Med* 2018; **7**:

1  
2  
3 565-82.

4 17. Fernández-Martos C, Pericay C, Losa F, et al. Effect of Aflibercept Plus Modified  
5 FOLFOX6 Induction Chemotherapy Before Standard Chemoradiotherapy and Surgery in  
6 Patients With High-Risk Rectal Adenocarcinoma: The GEMCAD 1402 Randomized Clinical  
7 Trial. *JAMA Oncol* 2019; **5**: 1566-73.

8 18. Konishi T, Shinozaki E, Murofushi K, et al. Phase II Trial of Neoadjuvant  
9 Chemotherapy, Chemoradiotherapy, and Laparoscopic Surgery with Selective Lateral Node  
10 Dissection for Poor-Risk Low Rectal Cancer. *Ann Surg Oncol* 2019; **26**: 2507-13.

11 19. Xiao J, Chen Z, Li W, et al. Sandwich-like neoadjuvant therapy with bevacizumab  
12 for locally advanced rectal cancer: a phase II trial. *Cancer Chemother Pharmacol* 2015; **76**:  
13 21-7.

14 20. Jorge JM, Wexner SD. Etiology and management of fecal incontinence. *Dis Colon*  
15 *Rectum* 1993; **36**: 77-97.

16 21. Emmertsen KJ, Laurberg S. Low anterior resection syndrome score: development  
17 and validation of a symptom-based scoring system for bowel dysfunction after low anterior  
18 resection for rectal cancer. *Ann Surg* 2012; **255**: 922-8.

19 22. Aaronson NK, Ahmedzai S, Bergman B, et al. The European Organization for  
20 Research and Treatment of Cancer QLQ-C30: a quality-of-life instrument for use in  
21 international clinical trials in oncology. *J Natl Cancer Inst* 1993; **85**: 365-76.

22 23. Whistance RN, Conroy T, Chie W, et al. Clinical and psychometric validation of the  
23 EORTC QLQ-CR29 questionnaire module to assess health-related quality of life in patients  
24 with colorectal cancer. *Eur J Cancer* 2009; **45**: 3017-26.

25 24. Dworak O, Keilholz L, Hoffmann A. Pathological features of rectal cancer after  
26 preoperative radiochemotherapy. *Int J Colorectal Dis* 1997; **12**: 19-23.

27 25. Chino A, Konishi T, Ogura A, et al. Endoscopic criteria to evaluate tumor response  
28 of rectal cancer to neoadjuvant chemoradiotherapy using magnifying chromoendoscopy. *Eur*  
29 *J Surg Oncol* 2018; **44**: 1247-53.

30 26. Ishioka M, Chino A, Ide D, et al. Adding Narrow-Band Imaging to  
31 Chromoendoscopy for the Evaluation of Tumor Response to Neoadjuvant Therapy in Rectal  
32 Cancer. *Dis Colon Rectum* 2021; **64**: 53-9.

33 27. Beets-Tan RGH, Lambregts DMJ, Maas M, et al. Magnetic resonance imaging for  
34 clinical management of rectal cancer: Updated recommendations from the 2016 European  
35 Society of Gastrointestinal and Abdominal Radiology (ESGAR) consensus meeting. *Eur*  
36 *Radiol* 2018; **28**: 1465-75.

37 28. Maas M, Lambregts DM, Nelemans PJ, et al. Assessment of Clinical Complete  
38 Response After Chemoradiation for Rectal Cancer with Digital Rectal Examination,  
39 Endoscopy, and MRI: Selection for Organ-Saving Treatment. *Ann Surg Oncol* 2015; **22**:  
40 3873-80.

41 29. Simon R. Optimal two-stage designs for phase II clinical trials. *Control Clin Trials*  
42 1989; **10**: 1-10.

**Figure Legends**

**Figure 1** Study flowchart

For peer review only

1  
2  
3  
4  
5  
6  
7  
8  
9  
10  
11  
12  
13  
14  
15  
16  
17  
18  
19  
20  
21  
22  
23  
24  
25  
26  
27  
28  
29  
30  
31  
32  
33  
34  
35  
36  
37  
38  
39  
40  
41  
42  
43  
44  
45  
46  
47  
48  
49  
50  
51  
52  
53  
54  
55  
56  
57  
58  
59  
60

Table 1 Criteria for response assessment

|           |                               |                                      | <b>cCR</b>                                                                      | <b>Near cCR</b>                                     | <b>Non-CR</b>                                                                                          |
|-----------|-------------------------------|--------------------------------------|---------------------------------------------------------------------------------|-----------------------------------------------------|--------------------------------------------------------------------------------------------------------|
| Endoscopy | WL-C                          | Ulcer                                | Closed                                                                          | Closed                                              | Open                                                                                                   |
|           |                               | Scar                                 | Linear and flat (white)                                                         | Irregular surface (reddish)                         | Incompletely closed ulcer,<br>residual erosion or white moss                                           |
|           |                               | Protruded tumor<br>nodule            | No                                                                              | No                                                  | Yes                                                                                                    |
|           |                               | Wall extension                       | Normal                                                                          | Decreased                                           | Poor with submucosal tumor-like<br>deformity                                                           |
|           | ME                            | Vessel pattern                       | Regular circulated/lacy                                                         | Lack of uniformity                                  | Calibre change/irregularity                                                                            |
|           |                               | Surface pattern<br>(Chromoendoscopy) | Uniformly arranged regeneration pits<br>or hypercellular pits                   | Regenerated pits irregularly arranged               | Residual neoplastic pit pattern                                                                        |
| DRE       |                               |                                      | Normal                                                                          | Smooth induration or minor mucosal<br>abnormalities | Tumor nodules palpable                                                                                 |
| MRI       | T2WI                          | Tumor bed                            | Normalized rectal wall or no residual<br>fibrotic hypointense signal            | Intermediate signal in the tumor bed and            | Residual intermediate tumor signal<br>(regardless of the percentage of<br>fibrotic hypointense signal) |
|           |                               | Lymph node                           | Downsizing of involved lymph nodes to a short-axis diameter <5 mm               |                                                     | Partial or no regression of involved<br>lymph nodes with a short-axis<br>diameter ≥5 mm                |
|           | DWI (b800 or<br>b1000 images) | Tumor bed                            | No high signal on high b-value images and no low ADC signal in the tumor<br>bed |                                                     | Presence of high signal on high<br>b-value images and low ADC signal<br>in the tumor bed               |

*cCR* clinical complete response, *near cCR* near clinical complete response, *Non-CR* non-complete response, *WL-C* White light conventional endoscopy, *ME* magnifying endoscopy, *NBI* narrow-band imaging, *DRE* digital rectal examination, *T2WI* T2-weighted images, *DWI* diffusion-weighted images, *ADC* apparent diffusion coefficient.

Table 2 Follow-up protocol for non-operative management

| <b>Time from final response assessment</b> | <b>Tumor marker<sup>a</sup></b> | <b>DRE</b> | <b>MRI<sup>b</sup></b> | <b>CT<sup>c</sup></b> | <b>Endoscopy</b> | <b>Adverse events</b> | <b>PROM<sup>d</sup></b> |
|--------------------------------------------|---------------------------------|------------|------------------------|-----------------------|------------------|-----------------------|-------------------------|
| 3 months <sup>e</sup>                      | x                               | x          | x                      |                       | Rectum           | x                     |                         |
| 6 months                                   | x                               | x          | x                      | x                     | Rectum           | x                     | x                       |
| 9 months                                   | x                               | x          | x                      |                       | Rectum           | x                     |                         |
| 1 year                                     | x                               | x          | x                      | x                     | Total            | x                     | x                       |
| 1 year 3 months                            | x                               | x          | x                      |                       | Rectum           | x                     |                         |
| 1 year 6 months                            | x                               | x          | x                      | x                     | Rectum           | x                     |                         |
| 1 year 9 months                            | x                               | x          | x                      |                       | Rectum           | x                     |                         |
| 2 years                                    | x                               | x          | x                      | x                     | Rectum           | x                     | x                       |
| 2 years 6 months                           | x                               | x          | x                      | x                     | Rectum           | x                     |                         |
| 3 years                                    | x                               | x          | x                      | x                     | Total            | x                     | x                       |
| 3 years 6 months                           | x                               | x          | x                      | x                     | Rectum           | x                     |                         |
| 4 years                                    | x                               | x          | x                      | x                     | Rectum           | x                     |                         |
| 4 years 6 months                           | x                               | x          | x                      | x                     | Rectum           | x                     |                         |
| 5 years                                    | x                               | x          | x                      | x                     | Total            | x                     |                         |

<sup>a</sup>Tumor marker includes serum carcinoembryonic antigen (CEA) and carbohydrate (CA) 19-9.

<sup>b</sup>MRI includes pelvic MRI

<sup>c</sup>CT includes chest/abdomen/pelvis CT

<sup>d</sup>PROM includes EORTC QLQ - C30 and CR29, Wexner score, and LARS-scale

<sup>e</sup>Near cCR patients will be followed every 6-8 weeks for the first 6 months

*DRE* digital rectal examination, *MRI* magnetic resonance imaging, *CT* computed tomography, *PROM* patient-reported outcome measure

Clinical stage II/III (cT3-4 cNany) rectal cancer  $\leq 5$  cm from the anal verge or candidate for abdominoperineal resection (APR) or intersphincteric resection prior to neoadjuvant therapy

Randomisation  
Allocation: Institution, cT, cN

Arm A  
Consolidation

Arm B  
Sandwich

CRT  
(50.4Gy with  
Capecitabine)

CapeOx  
+ Bevacizumab  
3 courses

Interval evaluation  
(DRE, CT,  
MRI, endoscopy)

Interval evaluation  
(DRE, CT,  
MRI, endoscopy)

CapeOx  
3 courses

CRT (50.4Gy  
with Capecitabine)

Interval evaluation  
(DRE, CT,  
MRI, endoscopy)

Interval evaluation  
(DRE, CT,  
MRI, endoscopy)

CapeOx  
3 courses

CapeOx  
3 courses

Final evaluation  
(DRE, CT,  
MRI, endoscopy)

Non-CR

cCR

Near-cCR

TME

NOM or TME

NOM or TME

1  
2  
3  
4  
5  
6  
7  
8  
9  
10  
11  
12  
13  
14  
15  
16  
17  
18  
19  
20  
21  
22  
23  
24  
25  
26  
27  
28  
29  
30  
31  
32  
33  
34  
35  
36  
37  
38  
39  
40  
41

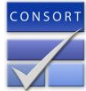

## CONSORT 2010 checklist of information to include when reporting a randomised trial\*

| Section/Topic                    | Item No | Checklist item                                                                                                                                                                              | Reported on page No |
|----------------------------------|---------|---------------------------------------------------------------------------------------------------------------------------------------------------------------------------------------------|---------------------|
| <b>Title and abstract</b>        |         |                                                                                                                                                                                             |                     |
|                                  | 1a      | Identification as a randomised trial in the title                                                                                                                                           | 1                   |
|                                  | 1b      | Structured summary of trial design, methods, results, and conclusions (for specific guidance see CONSORT for abstracts)                                                                     | 3                   |
| <b>Introduction</b>              |         |                                                                                                                                                                                             |                     |
| Background and objectives        | 2a      | Scientific background and explanation of rationale                                                                                                                                          | 5-7                 |
|                                  | 2b      | Specific objectives or hypotheses                                                                                                                                                           | 5-7                 |
| <b>Methods</b>                   |         |                                                                                                                                                                                             |                     |
| Trial design                     | 3a      | Description of trial design (such as parallel, factorial) including allocation ratio                                                                                                        | 7                   |
|                                  | 3b      | Important changes to methods after trial commencement (such as eligibility criteria), with reasons                                                                                          | NA                  |
| Participants                     | 4a      | Eligibility criteria for participants                                                                                                                                                       | 9                   |
|                                  | 4b      | Settings and locations where the data were collected                                                                                                                                        | 11                  |
| Interventions                    | 5       | The interventions for each group with sufficient details to allow replication, including how and when they were actually administered                                                       | 11                  |
| Outcomes                         | 6a      | Completely defined pre-specified primary and secondary outcome measures, including how and when they were assessed                                                                          | 8                   |
|                                  | 6b      | Any changes to trial outcomes after the trial commenced, with reasons                                                                                                                       | NA                  |
| Sample size                      | 7a      | How sample size was determined                                                                                                                                                              | 10                  |
|                                  | 7b      | When applicable, explanation of any interim analyses and stopping guidelines                                                                                                                | 13                  |
| <b>Randomisation:</b>            |         |                                                                                                                                                                                             |                     |
| Sequence generation              | 8a      | Method used to generate the random allocation sequence                                                                                                                                      | 11                  |
|                                  | 8b      | Type of randomisation; details of any restriction (such as blocking and block size)                                                                                                         | 11                  |
| Allocation concealment mechanism | 9       | Mechanism used to implement the random allocation sequence (such as sequentially numbered containers), describing any steps taken to conceal the sequence until interventions were assigned | 11                  |
| Implementation                   | 10      | Who generated the random allocation sequence, who enrolled participants, and who assigned participants to interventions                                                                     | 11                  |
| Blinding                         | 11a     | If done, who was blinded after assignment to interventions (for example, participants, care providers, those                                                                                | NA                  |



|                                                      |     |                                                                                                                                                   |     |
|------------------------------------------------------|-----|---------------------------------------------------------------------------------------------------------------------------------------------------|-----|
|                                                      |     | assessing outcomes) and how                                                                                                                       |     |
|                                                      | 11b | If relevant, description of the similarity of interventions                                                                                       | NA  |
| Statistical methods                                  | 12a | Statistical methods used to compare groups for primary and secondary outcomes                                                                     | 12  |
|                                                      | 12b | Methods for additional analyses, such as subgroup analyses and adjusted analyses                                                                  | 12  |
| <b>Results</b>                                       |     |                                                                                                                                                   |     |
| Participant flow (a diagram is strongly recommended) | 13a | For each group, the numbers of participants who were randomly assigned, received intended treatment, and were analysed for the primary outcome    | NA  |
|                                                      | 13b | For each group, losses and exclusions after randomisation, together with reasons                                                                  | NA  |
| Recruitment                                          | 14a | Dates defining the periods of recruitment and follow-up                                                                                           | NA  |
|                                                      | 14b | Why the trial ended or was stopped                                                                                                                | NA  |
| Baseline data                                        | 15  | A table showing baseline demographic and clinical characteristics for each group                                                                  | NA  |
| Numbers analysed                                     | 16  | For each group, number of participants (denominator) included in each analysis and whether the analysis was by original assigned groups           | NA  |
| Outcomes and estimation                              | 17a | For each primary and secondary outcome, results for each group, and the estimated effect size and its precision (such as 95% confidence interval) | NA  |
|                                                      | 17b | For binary outcomes, presentation of both absolute and relative effect sizes is recommended                                                       | NA  |
| Ancillary analyses                                   | 18  | Results of any other analyses performed, including subgroup analyses and adjusted analyses, distinguishing pre-specified from exploratory         | NA  |
| Harms                                                | 19  | All important harms or unintended effects in each group (for specific guidance see CONSORT for harms)                                             | NA  |
| <b>Discussion</b>                                    |     |                                                                                                                                                   |     |
| Limitations                                          | 20  | Trial limitations, addressing sources of potential bias, imprecision, and, if relevant, multiplicity of analyses                                  | 4   |
| Generalisability                                     | 21  | Generalisability (external validity, applicability) of the trial findings                                                                         | NA  |
| Interpretation                                       | 22  | Interpretation consistent with results, balancing benefits and harms, and considering other relevant evidence                                     | NA  |
| <b>Other information</b>                             |     |                                                                                                                                                   |     |
| Registration                                         | 23  | Registration number and name of trial registry                                                                                                    | 3-4 |
| Protocol                                             | 24  | Where the full trial protocol can be accessed, if available                                                                                       | NA  |
| Funding                                              | 25  | Sources of funding and other support (such as supply of drugs), role of funders                                                                   | 14  |

\*We strongly recommend reading this statement in conjunction with the CONSORT 2010 Explanation and Elaboration for important clarifications on all the items. If relevant, we also recommend reading CONSORT extensions for cluster randomised trials, non-inferiority and equivalence trials, non-pharmacological treatments, herbal interventions, and pragmatic trials. Additional extensions are forthcoming: for those and for up to date references relevant to this checklist, see [www.consort-statement.org](http://www.consort-statement.org).

# BMJ Open

**Study Protocol: Non-operative management after chemoradiotherapy plus consolidation or sandwich (induction with bevacizumab and consolidation) chemotherapy in patients with locally advanced rectal cancer: A multicentre, randomised phase II trial (NOMINATE trial)**

|                               |                                                                                                                                                                                                                                                                                                                                                                                                                                                                                                                                                                                                                                                                                                                                                                                                                                                                                                                                                                                                                                                                                                                                                                                                                                                                                                                                                                                                                                                                                                                                                                                                                                                                                                                                                                                                                                                                                                            |
|-------------------------------|------------------------------------------------------------------------------------------------------------------------------------------------------------------------------------------------------------------------------------------------------------------------------------------------------------------------------------------------------------------------------------------------------------------------------------------------------------------------------------------------------------------------------------------------------------------------------------------------------------------------------------------------------------------------------------------------------------------------------------------------------------------------------------------------------------------------------------------------------------------------------------------------------------------------------------------------------------------------------------------------------------------------------------------------------------------------------------------------------------------------------------------------------------------------------------------------------------------------------------------------------------------------------------------------------------------------------------------------------------------------------------------------------------------------------------------------------------------------------------------------------------------------------------------------------------------------------------------------------------------------------------------------------------------------------------------------------------------------------------------------------------------------------------------------------------------------------------------------------------------------------------------------------------|
| Journal:                      | <i>BMJ Open</i>                                                                                                                                                                                                                                                                                                                                                                                                                                                                                                                                                                                                                                                                                                                                                                                                                                                                                                                                                                                                                                                                                                                                                                                                                                                                                                                                                                                                                                                                                                                                                                                                                                                                                                                                                                                                                                                                                            |
| Manuscript ID                 | bmjopen-2021-055140.R1                                                                                                                                                                                                                                                                                                                                                                                                                                                                                                                                                                                                                                                                                                                                                                                                                                                                                                                                                                                                                                                                                                                                                                                                                                                                                                                                                                                                                                                                                                                                                                                                                                                                                                                                                                                                                                                                                     |
| Article Type:                 | Protocol                                                                                                                                                                                                                                                                                                                                                                                                                                                                                                                                                                                                                                                                                                                                                                                                                                                                                                                                                                                                                                                                                                                                                                                                                                                                                                                                                                                                                                                                                                                                                                                                                                                                                                                                                                                                                                                                                                   |
| Date Submitted by the Author: | 24-Oct-2021                                                                                                                                                                                                                                                                                                                                                                                                                                                                                                                                                                                                                                                                                                                                                                                                                                                                                                                                                                                                                                                                                                                                                                                                                                                                                                                                                                                                                                                                                                                                                                                                                                                                                                                                                                                                                                                                                                |
| Complete List of Authors:     | <p>Akiyoshi, Takashi; Cancer Institute Hospital Department of Gastroenterological Surgery<br/>         Shinozaki, Eiji; Cancer Institute Hospital of JFCR<br/>         Taguchi, Senzo; Cancer Institute Hospital, Department of Radiation Oncology<br/>         Chino, Akiko; Cancer Institute Hospital, Department of Gastroenterology<br/>         Hiratsuka, Makiko; Cancer Institute Hospital, Department of Diagnostic Imaging<br/>         Tominaga, Tetsuro; Nagasaki University, Department of Surgical Oncology<br/>         Nonaka, Takashi; Nagasaki University, Department of Surgical Oncology<br/>         Toda, Shigeo; Toranomon Hospital, Department of Gastroenterological Surgery<br/>         Matoba, Shuichiro; Toranomon Hospital, Department of Gastroenterological Surgery<br/>         Matsui, Shimpei; Keio University School of Medicine Graduate School of Medicine, Department of Surgery<br/>         Okabayashi, Koji ; Keio University School of Medicine Graduate School of Medicine Department of Surgery<br/>         Mukai, Toshiki; Cancer Institute Hospital Department of Gastroenterological Surgery<br/>         Hiyoshi, Yukiharu; Cancer Institute Hospital Department of Gastroenterological Surgery<br/>         Yamaguchi, Tomohiro; Cancer Institute Hospital Department of Gastroenterological Surgery<br/>         Nagasaki, Toshiya; Cancer Institute Hospital Department of Gastroenterological Surgery<br/>         Yamaguchi, Kensei; Cancer Institute Hospital<br/>         Ueno, Masashi; Toranomon Hospital, Department of Gastroenterological Surgery<br/>         Kuroyanagi, Hiroya; Toranomon Hospital, Department of Gastroenterological Surgery<br/>         Fukunaga, Yosuke; Cancer Institute Hospital Department of Gastroenterological Surgery<br/>         Ishizuka, Naoki; Cancer Institute Hospital, Department of Clinical Trial</p> |

1  
2  
3  
4  
5  
6  
7  
8  
9  
10  
11  
12  
13  
14  
15  
16  
17  
18  
19  
20  
21  
22  
23  
24  
25  
26  
27  
28  
29  
30  
31  
32  
33  
34  
35  
36  
37  
38  
39  
40  
41  
42  
43  
44  
45  
46  
47  
48  
49  
50  
51  
52  
53  
54  
55  
56  
57  
58  
59  
60

|                                                        |                                                                                                                                            |
|--------------------------------------------------------|--------------------------------------------------------------------------------------------------------------------------------------------|
|                                                        | Planning and Management<br>Konishi, Tsuyoshi; The University of Texas MD Anderson Cancer Center,<br>Department of Colon and Rectal Surgery |
| <b>&lt;b&gt;Primary Subject<br/>Heading&lt;/b&gt;:</b> | Oncology                                                                                                                                   |
| <b>Secondary Subject Heading:</b>                      | Gastroenterology and hepatology, Surgery                                                                                                   |
| <b>Keywords:</b>                                       | CHEMOTHERAPY, RADIOTHERAPY, Colorectal surgery < SURGERY                                                                                   |
|                                                        |                                                                                                                                            |

SCHOLARONE™  
Manuscripts

Akiyoshi, 1

Protocol

**Study Protocol: Non-operative management after chemoradiotherapy plus consolidation or sandwich (induction with bevacizumab and consolidation) chemotherapy in patients with locally advanced rectal cancer: A multicentre, randomised phase II trial (NOMINATE trial)**

**Takashi Akiyoshi<sup>1</sup>, Eiji Shinozaki<sup>2</sup>, Senzo Taguchi<sup>3</sup>, Akiko Chino<sup>4</sup>, Makiko Hiratsuka<sup>5</sup>, Tetsuro Tominaga<sup>6</sup>, Takashi Nonaka<sup>6</sup>, Shigeo Toda<sup>7</sup>, Shuichiro Matoba<sup>7</sup>, Shimpei Matsui<sup>8</sup>, Koji Okabayashi<sup>8</sup>, Toshiki Mukai<sup>1</sup>, Yukiharu Hiyoshi<sup>1</sup>, Tomohiro Yamaguchi<sup>1</sup>, Toshiya Nagasaki<sup>1</sup>, Kensei Yamaguchi<sup>2</sup>, Masashi Ueno<sup>7</sup>, Hiroya Kuroyanagi<sup>7</sup>, Yosuke Fukunaga<sup>1</sup>, Naoki Ishizuka<sup>9</sup>, Tsuyoshi Konishi<sup>10</sup>, for NOMINATE Collaborative Group**

<sup>1</sup>Gastroenterological Centre, Department of Gastroenterological Surgery, Cancer Institute Hospital, Japanese Foundation for Cancer Research, Tokyo, Japan

<sup>2</sup>Gastroenterological Centre, Department of Gastroenterological Chemotherapy, Cancer Institute Hospital, Japanese Foundation for Cancer Research, Tokyo, Japan

<sup>3</sup>Department of Radiation Oncology, Cancer Institute Hospital, Japanese Foundation for Cancer Research, Tokyo, Japan.

<sup>4</sup>Gastroenterological Centre, Department of Gastroenterology, Cancer Institute Hospital of the Japanese Foundation for Cancer Research, Tokyo, Japan.

<sup>5</sup>Department of Diagnostic Imaging, Cancer Institute Hospital, Japanese Foundation for Cancer Research, Tokyo, Japan.

<sup>6</sup>Department of Surgical Oncology, Nagasaki University Graduate School of Biomedical

1  
2  
3  
4 Science, Nagasaki, Japan.  
5

6 <sup>7</sup>Department of Gastroenterological Surgery, Toranomon Hospital, Tokyo, Japan.  
7

8 <sup>8</sup>Department of Surgery, Keio University School of Medicine, Tokyo, Japan  
9

10 <sup>9</sup>Department of Clinical Trial Planning and Management, Cancer Institute Hospital, Japanese  
11  
12 Foundation for Cancer Research, Tokyo, Japan.  
13  
14

15 <sup>10</sup>Department of Colon and Rectal Surgery, The University of Texas M.D. Anderson Cancer  
16  
17 Centre, Houston, Texas, USA  
18  
19

20  
21  
22  
23 **Correspondence to:** T. Akiyoshi, Gastroenterological Centre, Department of  
24  
25 Gastroenterological Surgery, Cancer Institute Hospital, Japanese Foundation for Cancer  
26  
27 Research, 3-8-31 Ariake, Koto-ku, Tokyo 135-8550, Japan  
28

29  
30 Phone: +81-03-3520-0111; fax: +81-03-3520-0141; e-mail: [takashi.akiyoshi@jfcrr.or.jp](mailto:takashi.akiyoshi@jfcrr.or.jp)  
31  
32

33  
34  
35 **Word count:** 2,475 words  
36  
37  
38  
39  
40  
41  
42  
43  
44  
45  
46  
47  
48  
49  
50  
51  
52  
53  
54  
55  
56  
57  
58  
59  
60

## ABSTRACT

**Introduction:** Total mesorectal excision (TME) and postoperative adjuvant chemotherapy following neoadjuvant chemoradiotherapy (CRT) is the standard treatment for locally advanced rectal cancer (LARC). However, neoadjuvant CRT has no recognized impact on reducing distant recurrence, and patients suffer from a long-lasting impairment in quality of life (QOL) associated with TME. Total neoadjuvant therapy (TNT) is an alternative approach that could reduce distant metastases and increase the proportion of patients who could safely undergo non-operative management (NOM). This study is designed to compare two TNT regimens in the context of NOM for selecting a more optimal regimen for patients with LARC.

**Methods and analysis:** NOMINATE trial is a prospective, multicentre, randomised phase II selection design study. Patients must have clinical stage II or III (T3-T4Nany) LARC with distal location ( $\leq 5$  cm from the anal verge or for those who are candidates for abdominoperineal resection or intersphincteric resection). Patients will be randomised to either Arm A consisting of CRT (50.4 Gy with capecitabine) followed by consolidation chemotherapy (6 cycles of CapeOx), or Arm B consisting of induction chemotherapy (3 cycles of CapeOx plus bevacizumab) followed by CRT and consolidation chemotherapy (3 cycles of CapeOx). In the case of clinical complete response (cCR) or near cCR, patients will progress to NOM. Response assessment involves a combination of digital rectal examination, endoscopy, and MRI. The primary endpoint is the proportion of patients achieving pathological CR or cCR  $\geq 2$  years, defined as the absence of local regrowth within 2 years after the start of NOM among eligible patients. Secondary endpoints include the cCR rate, near cCR rate, rate of NOM, overall survival, distant metastasis-free survival, locoregional failure-free survival, time to disease-related treatment failure, TME-free survival, permanent stoma-free survival, safety of the treatment, completion rate of the treatment, and quality of

1  
2  
3  
4 life. Allowing for a drop-out rate of 10%, 66 patients (33 per arm) from 5 institutions will be  
5  
6 accrued.

7  
8 **Ethics and dissemination:** The study protocol was approved by Wakayama Medical  
9  
10 University Certified Review Board in December 2020. Trial results will be published in peer-  
11  
12 reviewed international journals and on the jRCT website.  
13  
14

15  
16 **Trial registration number** jRCTs051200121  
17  
18

### 19 20 21 22 23 24 **Strength and limitations of this study**

- 25  
26  
27 ▶ This phase II study is the first study of total neoadjuvant therapy and non-operative  
28  
29 management to compare the efficacy and safety of consolidation chemotherapy to  
30  
31 sandwich chemotherapy using bevacizumab combined with capecitabine-based  
32  
33 chemoradiotherapy for locally advanced rectal cancer.  
34  
35  
36 ▶ This study includes clinical T3-T4NanyM0, mismatch repair-proficient rectal cancer with  
37  
38 distal location.  
39  
40  
41 ▶ The assessment of a clinical complete response and near clinical complete response will  
42  
43 be performed based on pre-defined response criteria.  
44  
45  
46 ▶ Patients treated with non-operative management will undergo intensive monitoring as per  
47  
48 the follow-up protocol.  
49  
50  
51 ▶ Confirmatory conclusions cannot be drawn from this randomised phase II study with  
52  
53 relatively small sample size and a limited number of participating centres.  
54  
55  
56  
57  
58  
59  
60

## INTRODUCTION

The current standard treatment for locally advanced rectal cancer (LARC) is neoadjuvant chemoradiotherapy (CRT), total mesorectal excision (TME), and postoperative adjuvant chemotherapy. This multimodality treatment has significantly reduced local recurrence rates to <10%. However, neoadjuvant CRT has failed to reduce distant recurrence or improve disease-free survival (DFS) and overall survival (OS). Despite the adoption of adjuvant postoperative chemotherapy, distant relapse occurs in about 30% of patients at 5 years.<sup>1</sup> The benefit of postoperative adjuvant chemotherapy following neoadjuvant CRT remains unclear, possibly due to poor compliance to chemotherapy, a longer interval between diagnosis and commencing chemotherapy, and the application of suboptimal regimens.<sup>2</sup> These limitations have led to the development of a total neoadjuvant therapy (TNT) approach, which delivers both radiotherapy and systemic chemotherapy preoperatively in an attempt to treat micrometastases earlier, increase adherence to systemic chemotherapy, and improve DFS. Two recent phase 3 randomised controlled trials investigating TNT (RAPIDO<sup>3</sup> and PRODIGE 23 trial<sup>4</sup>) showed better pathological complete response (pCR) rate and fewer distant metastases in the TNT arm as compared with the standard short-course radiotherapy or CRT arm.

Numerous studies have shown that patients with a pCR have more favourable long-term oncological outcomes in terms of distant and local control,<sup>5</sup> and this has raised the question as to whether TME can be avoided in patients with pCR. Because TME is associated with postoperative complications and late morbidity, such as bowel, sexual, and urinary dysfunction,<sup>6,7</sup> avoiding TME may provide an opportunity to reduce the morbidity and the need of a permanent stoma, and improve quality of life (QOL). In 2004, Habr-Gama et al. for the first time proposed a watch-and-wait (WW) approach or non-operative management



(NOM) for patients with a clinical complete response (cCR) after CRT.<sup>8</sup> Since then, many studies—mainly retrospective observational studies—have shown NOM to be a feasible option for patients with cCR after CRT.<sup>9,10</sup>

TNT has the potential to increase the proportion of patients achieving cCR and thus being eligible for NOM;<sup>11</sup> however, randomised trial data evaluating the efficacy of NOM in the context of TNT are lacking. OPRA was the first randomised phase II trial to address the efficacy of TNT and NOM for patients with cCR or near cCR, with the primary endpoint of 3-year DFS, as compared with standard historical controls managed with CRT and TME followed by adjuvant chemotherapy.<sup>12</sup> In the OPRA trial, 306 patients with LARC were randomised to receive 4 months of 5-Fluorouracil (5-FU), Leucovorin and Oxaliplatin (FOLFOX) or Capecitabine and Oxaliplatin (CapeOx) either before (induction chemotherapy) or after (consolidation chemotherapy) CRT, followed by NOM for patients with cCR or near cCR. Preliminary analyses demonstrated higher 3-year organ preservation rates in the consolidation arm over the induction arm (59% vs 43%).<sup>13</sup> Similarly, in the CAO/ARO/AIO-12 phase II trial, which randomly assigned patients to either induction or consolidation chemotherapy (3 cycles of FOLFOX) before or after oxaliplatin-based CRT followed by TME, demonstrated higher pCR rates in the consolidation arm as compared with the induction arm (25% vs 17%).<sup>14</sup> Given these results, CRT followed by consolidation chemotherapy may enable greater organ preservation, and should be preferentially considered.<sup>15</sup>

On the other hand, several studies have shown that the addition of anti-vascular endothelial growth factor (VEGF) drugs before radiotherapy can enhance the radiation response in LARC.<sup>16,17</sup> In the GEMCAD 1402 randomised phase II trial of induction chemotherapy with 3 months of mFOLFOX6 with or without aflibercept followed by CRT

Akiyoshi, 7

1  
2  
3  
4 and TME, patients in the aflibercept arm demonstrated a higher pCR rate than those without  
5  
6 aflibercept (22.6% vs 13.8%).<sup>18</sup> In a single-arm phase II trial of 3 months of mFOLFOX6  
7  
8 plus bevacizumab prior to CRT, we reported a pCR rate of 37% with favourable toxicity in a  
9  
10 series of 43 patients with poor-risk LARC.<sup>19</sup> Furthermore, a single-arm phase II study of  
11  
12 sandwich-like neoadjuvant therapy consisting of one cycle of induction FOLFOX with  
13  
14 bevacizumab, followed by CRT with three doses of bevacizumab, and one cycle of  
15  
16 consolidation FOLFOX, also reported a high pCR rate (39.1%).<sup>20</sup> Given these results, we  
17  
18 hypothesized that sandwich-like therapy of 3 cycles of induction chemotherapy with  
19  
20 bevacizumab and 3 cycles of consolidation chemotherapy could provide the advantages of  
21  
22 both induction (addressing micrometastatic disease earlier and enhanced CRT response by  
23  
24 bevacizumab) and consolidation (greater pCR or NOM rate) therapy arms. We chose long-  
25  
26 course CRT because there was limited data on the use of short-course radiotherapy in  
27  
28 NOM.<sup>21</sup>

29  
30  
31  
32  
33  
34  
35 To this end, we designed this randomised phase II trial (NOMINATE trial) of TNT  
36  
37 and NOM to compare the efficacy and safety of consolidation chemotherapy (6 cycles of  
38  
39 CapeOx) to a sandwich chemotherapy regimen using bevacizumab (3 cycles of CapeOx plus  
40  
41 bevacizumab as induction chemotherapy and 3 cycles of CapeOx as consolidation  
42  
43 chemotherapy) combined with capecitabine-based CRT.  
44  
45  
46  
47  
48  
49  
50  
51

## 52 **METHODS AND ANALYSIS**

### 53 **Study design**

54  
55  
56  
57 This is a prospective, multicentre, randomised phase II selection design study to compare two  
58  
59 TNT regimens in the context of NOM for selecting a more optimal regimen for patients with  
60

1  
2  
3  
4 LARC. The study flowchart is shown in Figure 1.  
5  
6  
7

### 8 **Primary endpoint**

9  
10  
11 The primary endpoint is the proportion of patients achieving pCR or cCR  $\geq 2$  years among  
12  
13 eligible patients. pCR is defined as no residual tumor cells in the surgical specimen. cCR  $\geq 2$   
14  
15 years is defined as the absence of local regrowth within 2 years after the start of NOM.  
16  
17  
18

### 19 **Secondary endpoints**

20  
21  
22  
23 Secondary endpoints include cCR rate, near cCR rate, rate of NOM, OS, distant metastasis-  
24  
25 free survival, locoregional failure-free survival, time to disease-related treatment failure,  
26  
27 TME-free survival, permanent stoma-free survival, safety of the treatment, completion rate of  
28  
29 the treatment, faecal incontinence according to Wexner score<sup>22</sup> and Low Anterior Resection  
30  
31 Syndrome (LARS)-scale<sup>23</sup>, and quality of life according to European Organization for  
32  
33 Research and Treatment of Cancer Quality of Life Questionnaire (EORTC QLQ) - C30<sup>24</sup> and  
34  
35 CR29<sup>25</sup>. Locoregional failure includes progressive unresectable disease, local R2 resection,  
36  
37 and intrapelvic recurrence after TME. Local regrowth after NOM is not considered as  
38  
39 locoregional failure when followed by an R0/R1 resection. Disease-related treatment failure  
40  
41 is defined as the first occurrence of locoregional failure, distant metastasis, a new primary  
42  
43 colorectal cancer, or treatment-related death.<sup>3</sup> In patients managed by TME, surgical  
44  
45 morbidity, R0 resection rate, pathological stage, Dworak tumour regression grade<sup>26</sup> will also  
46  
47 be assessed. In patients managed by NOM, local regrowth rate, time to local regrowth,  
48  
49 salvage surgery rate in patients with local regrowth, surgical morbidity in salvage surgery,  
50  
51 and R0 resection rate in salvage surgery will also be assessed. The grade of adverse events  
52  
53 will be assessed according to Common Terminology Criteria for Adverse Events (CTCAE)  
54  
55  
56  
57  
58  
59  
60

V.5.0.

### **Eligibility criteria**

#### **Inclusion criteria**

1. Histologically confirmed diagnosis of adenocarcinoma of the rectum.
2. The lowest part of the tumor  $\leq 5$  cm from the anal verge or patient is a candidate for abdominoperineal resection or intersphincteric resection prior to neoadjuvant therapy according to the primary surgeon.
3. Patients must have clinical stage II (cT3-4N0) or stage III (cT3-4N1-3) by MRI and CT.
4. ECOG PS 0 or 1.
5. Age  $\geq 20$  years.
6. Adequate organ functions within 28 days prior to entry: neutrophils  $\geq 1,500$  /mm<sup>3</sup>, platelets  $\geq 10 \times 10^4$  /mm<sup>3</sup>, haemoglobin  $\geq 9.0$  g/dL, total bilirubin  $\leq 2.0$  mg/dL, aspartate aminotransferase  $\leq 100$  IU/L, alanine aminotransferase  $\leq 100$  IU/L, serum creatinine  $\leq 1.5$  mg/dL or Ccr  $\geq 60$  mL/min/body, urine protein/creatinine  $< 1$ .
7. If there is bowel obstruction or significant stricture, stoma is constructed prior to neoadjuvant therapy.
8. Written informed consent is obtained.

#### **Exclusion criteria**

1. Patients with a history of a prior malignancy within the past 5 years, except for adequately treated cancer with 5-year relative survival rate  $\geq 95\%$ .
2. History of pelvic irradiation.
3. Administration contraindication of capecitabine, oxaliplatin, or bevacizumab.

4. Uncontrolled active infection.
5. Body temperature  $\geq 38$  °C at registration.
6. Possibly pregnant, pregnant, or nursing.
7. Patients with concurrent psychiatric condition or disease that would make them inappropriate candidates for entry into this study in the investigator's judgement.
8. Patients with concurrent serious comorbidity (heart failure, interstitial lung disease or pulmonary fibrosis, uncontrolled diabetes, renal failure, liver failure, hypertension, thrombotic disease, gastrointestinal fistula, among other similarly serious conditions).
9. History of operation  $\leq 4$  weeks ago or minor operation such as stoma construction  $\leq 2$  weeks ago.
10. Deficient in mismatch repair (dMMR), as determined by immunohistochemistry and/or microsatellite instability testing using pre-treatment biopsy specimens.
11. Other conditions not suitable for this study in the investigator's judgement.

### **Sample size calculation**

This study uses a “pick the winner” format proposed by Simon et al.<sup>27</sup> The expected lowest response rate of pCR or cCR  $\geq 2$  years is set at 25%.<sup>28</sup> If the difference in response rate between the treatment arms is at least 10%, 30 patients per arm (total 60 patients) is necessary to select the better treatment with a probability of  $\geq 80\%$ . With consideration for dropouts of 10%, 33 patients per arm (total 66 patients) will be necessary. If there are no differences in response rate between treatment arms, a better treatment will be chosen in terms of secondary endpoints such as toxicity and safety of the treatment.

### **Registration and randomization**

1  
2  
3  
4 Patients are registered to the study after confirming the eligibility criteria and written  
5  
6 informed consent is obtained. Patients are requested to fill out EORTC QLQ-C30, CR29, and  
7  
8 a questionnaire about faecal incontinence (Wexner score and LARS scale) at registration.  
9

10  
11 After registration, patients are randomly assigned at a 1:1 ratio to the consolidation arm (arm  
12  
13 A) or sandwich arm (arm B) using a minimization method stratified by institution, cT (cT3 vs  
14  
15 cT4), and cN (cN- vs cN+). Registration, randomization, and collection of patient information  
16  
17 will be performed using the Viedoc electronic data capture (EDC) system. Data are  
18  
19 anonymized using a unique patient identification number.  
20  
21  
22  
23  
24  
25

## 26 **Treatment**

27  
28 Arm A consists of CRT (50.4 Gy in 28 fractions and capecitabine 825mg/m<sup>2</sup> bid, day 1-5, 8-  
29  
30 12, 15-19, 22-26, 29-33, 36-38) followed by consolidation chemotherapy (6 cycles of  
31  
32 CapeOx: capecitabine 2000 mg/m<sup>2</sup>/day, days 1-14, oxaliplatin 130 mg/m<sup>2</sup>, day 1, Q3w).  
33  
34

35 Consolidation chemotherapy should start at 3-8 weeks after the last day of radiotherapy. Arm  
36  
37 B consists of induction chemotherapy (3 cycles of CapeOx plus bevacizumab: capecitabine  
38  
39 2000 mg/m<sup>2</sup>/day, days 1-14, oxaliplatin 130 mg/m<sup>2</sup>, day1, bevacizumab 7.5 mg/kg, day 1,  
40  
41 Q3w) followed by CRT (same as in Arm A) followed by consolidation chemotherapy (3  
42  
43 cycles of CapeOx). CRT should start at 3-6 weeks after the last day of induction  
44  
45 chemotherapy, and consolidation chemotherapy should start at 3-8 weeks after the last day of  
46  
47 radiotherapy.  
48  
49  
50  
51  
52  
53  
54

## 55 **Response assessment**

56  
57 Interval evaluation will be performed twice: after the completion of CRT and after the  
58  
59 completion of 3 cycles of consolidation chemotherapy in Arm A, and after the completion of  
60

induction chemotherapy and after the completion of CRT in Arm B. Final response assessment will be performed at 4 (- 1/+ 4) weeks after the completion of all neoadjuvant treatments. In the case of cCR or near cCR, patients will progress to NOM, but TME is also permitted if patients hope to undergo radical surgery. In the case of non-CR, patients will progress to TME. Criteria for response assessment are shown in Table 1.<sup>12,29-32</sup> Final response assessment involves a combination of digital rectal examination, endoscopy, and MRI, and will be discussed at online multidisciplinary-team meetings attended by the principal investigator (PI) and the local investigators.

Table 1 Criteria for response assessment

|           |      |                                   | <b>cCR</b>                                                                                                 | <b>Near cCR</b>                       | <b>Non-CR</b>                                                                                    |
|-----------|------|-----------------------------------|------------------------------------------------------------------------------------------------------------|---------------------------------------|--------------------------------------------------------------------------------------------------|
| Endoscopy | WL-C | Ulcer                             | Closed                                                                                                     | Closed                                | Open                                                                                             |
|           |      | Scar                              | Linear and flat (white)                                                                                    | Irregular surface (reddish)           | Incompletely closed ulcer, residual erosion or white moss                                        |
|           |      | Protruded tumor nodule            | No                                                                                                         | No                                    | Yes                                                                                              |
|           | ME   | Wall extension                    | Normal                                                                                                     | Decreased                             | Poor with submucosal tumor-like deformity                                                        |
|           |      | Vessel pattern (NBI)              | Regular circulated/lacy                                                                                    | Lack of uniformity                    | Calibre change/irregularity                                                                      |
|           |      | Surface pattern (Chromoendoscopy) | Uniformly arranged regeneration pits                                                                       | Regenerated pits irregularly arranged | Residual neoplastic pit pattern                                                                  |
| DRE       |      | Normal                            | Smooth induration or minor mucosal abnormalities                                                           | Tumor nodules palpable                |                                                                                                  |
| MRI       | T2WI | Tumor bed                         | Normalized rectal wall or no residual intermediate signal in the tumor bed and fibrotic hypointense signal |                                       | Residual intermediate tumor signal (regardless of the percentage of fibrotic hypointense signal) |
|           |      | Lymph node                        | Downsizing of involved lymph nodes to a short-axis diameter <5 mm                                          |                                       | Partial or no regression of involved lymph nodes with a short-axis diameter $\geq$ 5 mm          |

|                                     |           |                                                                                    |                                                                                             |
|-------------------------------------|-----------|------------------------------------------------------------------------------------|---------------------------------------------------------------------------------------------|
| DWI<br>(b800 or<br>b1000<br>images) | Tumor bed | No high signal on high b-value images<br>and no low ADC signal in the tumor<br>bed | Presence of high signal<br>on high b-value images<br>and low ADC signal in<br>the tumor bed |
|-------------------------------------|-----------|------------------------------------------------------------------------------------|---------------------------------------------------------------------------------------------|

*cCR* clinical complete response, *near cCR* near clinical complete response, *Non-CR* non-complete response, *WL-C* White light conventional endoscopy, *ME* magnifying endoscopy, *NBI* narrow-band imaging, *DRE* digital rectal examination, *T2WI* T2-weighted images, *DWI* diffusion-weighted images, *ADC* apparent diffusion coefficient.

## Follow-up

Patients treated with TME will be followed with measurements of serum carcinoembryonic antigen (CEA) and carbohydrate (CA) 19-9 and will be subjected to chest/abdomen/pelvis CT scan every 6 months for 5 years. Patients treated with NOM will be followed every 3 months for the first 2 years and every 6 months thereafter, as shown in Table 2. In the case of near *cCR*, patients will be followed every 6-8 weeks for the first 6 months. Salvage TME will be recommended for patients with local regrowth after NOM; if the patient refuses TME, local resection will also be acceptable. If a patient refuses surgical resection of local regrowth, it is considered as locoregional failure.

Table 2 Follow-up protocol for non-operative management

| Time from final response | Tumor marker | DRE | MRI <sup>b</sup> | CT <sup>c</sup> | Endoscopy | Adverse events | PROM <sup>d</sup> |
|--------------------------|--------------|-----|------------------|-----------------|-----------|----------------|-------------------|
| 3 months <sup>e</sup>    | x            | x   | x                |                 | Rectum    | x              |                   |
| 6 months                 | x            | x   | x                | x               | Rectum    | x              | x                 |
| 9 months                 | x            | x   | x                |                 | Rectum    | x              |                   |
| 1 year                   | x            | x   | x                | x               | Total     | x              | x                 |
| 1 year 3 months          | x            | x   | x                |                 | Rectum    | x              |                   |
| 1 year 6 months          | x            | x   | x                | x               | Rectum    | x              |                   |
| 1 year 9 months          | x            | x   | x                |                 | Rectum    | x              |                   |
| 2 years                  | x            | x   | x                | x               | Rectum    | x              | x                 |
| 2 years 6 months         | x            | x   | x                | x               | Rectum    | x              |                   |
| 3 years                  | x            | x   | x                | x               | Total     | x              | x                 |
| 3 years 6 months         | x            | x   | x                | x               | Rectum    | x              |                   |
| 4 years                  | x            | x   | x                | x               | Rectum    | x              |                   |
| 4 years 6 months         | x            | x   | x                | x               | Rectum    | x              |                   |
| 5 years                  | x            | x   | x                | x               | Total     | x              |                   |



<sup>a</sup>Tumor marker includes serum carcinoembryonic antigen (CEA) and carbohydrate (CA) 19-9.

<sup>b</sup>MRI includes pelvic MRI

<sup>c</sup>CT includes chest/abdomen/pelvis CT

<sup>d</sup>PROM includes EORTC QLQ - C30 and CR29, Wexner score, and LARS-scale

<sup>e</sup>Near cCR patients will be followed every 6-8 weeks for the first 6 months

*DRE* digital rectal examination, *MRI* magnetic resonance imaging, *CT* computed tomography, *PROM* patient-reported outcome measure

### Statistical analysis plan

The primary analysis will be conducted when 3 years have passed since patient accrual completion. All analyses are based on descriptive data without testing because of the study design. The proportions at the primary endpoint will be estimated using an Clopper-Pearson method for binomial response. The proportions among registered patients or patients who complete the protocol treatment will also be calculated as a reference. An analysis of secondary endpoints will also be performed to complement the results at the primary endpoint, but adjustment of multiplicity will not be performed due to their exploratory nature. Kaplan–Meier method will be used to estimate OS, with 95% CIs calculated by Greenwood's formula. Univariate Cox regression will be used to estimate HRs with 95% CIs associated with treatment arms. For endpoints with competing risk, such as distant metastasis-free survival, locoregional failure-free survival and an estimation of HRs will be performed using Fine and Grey models. The final analysis will be conducted when 6 years have passed since patient accrual completion.

### Interim analysis and monitoring

Interim analysis is planned for possible early trial termination to claim futility. In Simon's optimal two-stage design,<sup>33</sup> when the null hypothesis is a pCR or cCR/near cCR rate of 15% versus the alternative of 30% for each arm, and power and one-sided alpha are set at 80% and

1  
2  
3  
4 5%, respectively, 19 subjects will be accrued in the first stage. If there are 3 or fewer  
5  
6 responders within these 19 subjects, enrolment in that arm will be stopped. If the number of  
7  
8 treatment-related deaths reach two for each arm, the registration will be suspended until Data  
9  
10 and Safety Monitoring approve the continuation of the trial. The Data Centre (Clinical  
11  
12 Research and Medical Development Centre, Cancer Institute Hospital, Japanese Foundation  
13  
14 for Cancer Research) will perform central monitoring every 6 months and monitoring reports  
15  
16 will be submitted to the Data and Safety Monitoring Committee.  
17  
18  
19  
20  
21  
22

### 23 **Translational research**

24  
25 Accompanying translational research about the molecular determinants of response to TNT  
26  
27 and molecular predictors of successful organ preservation is planned. The specific study  
28  
29 protocol for correlative translational research to the NOMINATE trial has been approved by  
30  
31 the intuitional review boards of all participating institutions. Tumour tissue and plasma will  
32  
33 be collected and stored at different time points after obtaining written informed consent from  
34  
35 patients. Next-generation sequencing, such as exome sequencing, RNA sequencing, and  
36  
37 circulating tumour DNA analysis, will be performed.  
38  
39  
40  
41  
42  
43  
44

### 45 **Ethics and dissemination**

46  
47 Wakayama Medical University Certified Review Board approved this study protocol in  
48  
49 December 2020. The first patient was enrolled in March 2021, and the estimated study  
50  
51 completion date is November 2030. This trial will be performed in accordance with the  
52  
53 Declaration of Helsinki and Clinical Trials Act in Japan. Trial results of the primary and  
54  
55 secondary endpoints will be published in peer-reviewed international journals and on the  
56  
57 jRCT website (<https://jrct.niph.go.jp/>), as well as at international and national conferences.  
58  
59  
60

## Patient and public involvement

Patients or the public were not involved in the design, or conduct, or reporting, or dissemination plans of this study.

**Contributors** TA, ES, ST and TK developed the trial concept, wrote the protocol, and drafted the manuscript. NI designed the statistical analyses for the study. AC, MH, TT, TN, ST, SM, SM, KO, TM, YH, TY, TN, KY, MU, HK and YF have made substantial contributions to the conception and design of the work and subsequent protocol revisions. All authors read and approved the final manuscript.

**Funding** This trial receives no specific grant from any funding agency in the public, commercial or not-for-profit sectors at present.

**Competing interests** KY reports honoraria from Chugai Co., Ltd.

**Patient consent for publication** Not required.

**Ethics approval** Wakayama Medical University Certified Review Board (CRB5180004).

## References

1. Breugom AJ, Swets M, Bosset JF, et al. Adjuvant chemotherapy after preoperative (chemo)radiotherapy and surgery for patients with rectal cancer: a systematic review and meta-analysis of individual patient data. *Lancet Oncol* 2015;16:200-7.
2. Carvalho C, Glynne-Jones R. Challenges behind proving efficacy of adjuvant chemotherapy after preoperative chemoradiation for rectal cancer. *Lancet Oncol* 2017;18:e354-e63.
3. Bahadoer RR, Dijkstra EA, van Etten B, et al. Short-course radiotherapy followed by chemotherapy before total mesorectal excision (TME) versus preoperative chemoradiotherapy, TME, and optional adjuvant chemotherapy in locally advanced rectal cancer (RAPIDO): a randomised, open-label, phase 3 trial. *Lancet Oncol* 2021;22:29-42.
4. Conroy T, Bosset JF, Etienne PL, et al. Neoadjuvant chemotherapy with FOLFIRINOX and preoperative chemoradiotherapy for patients with locally advanced rectal cancer (UNICANCER-PRODIGE 23): a multicentre, randomised, open-label, phase 3 trial.

1  
2  
3  
4  
5  
6  
7  
8  
9  
10  
11  
12  
13  
14  
15  
16  
17  
18  
19  
20  
21  
22  
23  
24  
25  
26  
27  
28  
29  
30  
31  
32  
33  
34  
35  
36  
37  
38  
39  
40  
41  
42  
43  
44  
45  
46  
47  
48  
49  
50  
51  
52  
53  
54  
55  
56  
57  
58  
59  
60

*Lancet Oncol* 2021;22:702-15.

5. Maas M, Nelemans PJ, Valentini V, et al. Long-term outcome in patients with a pathological complete response after chemoradiation for rectal cancer: a pooled analysis of individual patient data. *Lancet Oncol* 2010;11:835-44.
6. Matsubara N, Miyata H, Gotoh M, et al. Mortality after common rectal surgery in Japan: a study on low anterior resection from a newly established nationwide large-scale clinical database. *Dis Colon Rectum* 2014;57:1075-81.
7. Honda M, Akiyoshi T, Noma H, et al. Patient-centered outcomes to decide treatment strategy for patients with low rectal cancer. *J Surg Oncol* 2016;114:630-6.
8. Habr-Gama A, Perez RO, Nadalin W, et al. Operative versus nonoperative treatment for stage 0 distal rectal cancer following chemoradiation therapy: long-term results. *Ann Surg* 2004;240:711-7.
9. van der Valk MJM, Hilling DE, Bastiaannet E, et al. Long-term outcomes of clinical complete responders after neoadjuvant treatment for rectal cancer in the International Watch & Wait Database (IWWD): an international multicentre registry study. *Lancet* 2018;391:2537-45.
10. Renehan AG, Malcomson L, Emsley R, et al. Watch-and-wait approach versus surgical resection after chemoradiotherapy for patients with rectal cancer (the OnCoRe project): a propensity-score matched cohort analysis. *Lancet Oncol* 2016;17:174-83.
11. Cercek A, Roxburgh CSD, Strombom P, et al. Adoption of Total Neoadjuvant Therapy for Locally Advanced Rectal Cancer. *JAMA Oncol* 2018;4:e180071.
12. Smith JJ, Chow OS, Gollub MJ, et al. Organ Preservation in Rectal Adenocarcinoma: a phase II randomized controlled trial evaluating 3-year disease-free survival in patients with locally advanced rectal cancer treated with chemoradiation plus induction or consolidation chemotherapy, and total mesorectal excision or nonoperative management. *BMC Cancer* 2015;15:767.
13. Garcia-Aguilar J, Patil S, Kim JK, et al. Preliminary results of the organ preservation of rectal adenocarcinoma (OPRA) trial. *J Clin Oncol* 2020;38(15\_suppl):4008.
14. Fokas E, Allgäuer M, Polat B, et al. Randomized Phase II Trial of Chemoradiotherapy Plus Induction or Consolidation Chemotherapy as Total Neoadjuvant Therapy for Locally Advanced Rectal Cancer: CAO/ARO/AIO-12. *J Clinical Oncol* 2019;37:3212-22.
15. Shi DD, Mamon HJ. Playing With Dynamite? A Cautious Assessment of TNT. *J Clin Oncol* 2021;39:103-6.
16. Zhou Y, Guo Z, Wu Z, et al. The efficacy and safety of adding bevacizumab in neoadjuvant therapy for locally advanced rectal cancer patients: A systematic review and meta-analysis. *Transl Oncol* 2021;14:100964.
17. Zhong X, Wu Z, Gao P, et al. The efficacy of adding targeted agents to neoadjuvant therapy for locally advanced rectal cancer patients: a meta-analysis. *Cancer Med* 2018;7:565-82.
18. Fernández-Martos C, Pericay C, Losa F, et al. Effect of Aflibercept Plus Modified FOLFOX6 Induction Chemotherapy Before Standard Chemoradiotherapy and Surgery in Patients With High-Risk Rectal Adenocarcinoma: The GEMCAD 1402 Randomized Clinical Trial. *JAMA Oncol* 2019;5:1566-73.
19. Konishi T, Shinozaki E, Murofushi K, et al. Phase II Trial of Neoadjuvant Chemotherapy, Chemoradiotherapy, and Laparoscopic Surgery with Selective Lateral Node Dissection for Poor-Risk Low Rectal Cancer. *Ann Surg Oncol* 2019;26:2507-13.

20. Xiao J, Chen Z, Li W, et al. Sandwich-like neoadjuvant therapy with bevacizumab for locally advanced rectal cancer: a phase II trial. *Cancer Chemother Pharmacol* 2015;76:21-7.
21. Yuval JB, Thompson HM, Garcia-Aguilar J. Organ Preservation in Rectal Cancer. *J Gastrointest Surg* 2020;24:1880-8.
22. Jorge JM, Wexner SD. Etiology and management of fecal incontinence. *Dis Colon Rectum* 1993;36:77-97.
23. Emmertsen KJ, Laurberg S. Low anterior resection syndrome score: development and validation of a symptom-based scoring system for bowel dysfunction after low anterior resection for rectal cancer. *Ann Surg* 2012;255:922-8.
24. Aaronson NK, Ahmedzai S, Bergman B, et al. The European Organization for Research and Treatment of Cancer QLQ-C30: a quality-of-life instrument for use in international clinical trials in oncology. *J Natl Cancer Inst* 1993;85:365-76.
25. Whistance RN, Conroy T, Chie W, et al. Clinical and psychometric validation of the EORTC QLQ-CR29 questionnaire module to assess health-related quality of life in patients with colorectal cancer. *Eur J Cancer* 2009;45:3017-26.
26. Dworak O, Keilholz L, Hoffmann A. Pathological features of rectal cancer after preoperative radiochemotherapy. *Int J Colorectal Dis* 1997;12:19-23.
27. Simon R, Wittes RE, Ellenberg SS. Randomized phase II clinical trials. *Cancer Treat Rep* 1985;69:1375-81.
28. Petrelli F, Trevisan F, Cabiddu M, et al. Total Neoadjuvant Therapy in Rectal Cancer: A Systematic Review and Meta-analysis of Treatment Outcomes. *Ann Surg* 2019;271:440-448
29. Chino A, Konishi T, Ogura A, et al. Endoscopic criteria to evaluate tumor response of rectal cancer to neoadjuvant chemoradiotherapy using magnifying chromoendoscopy. *Eur J Surg Oncol* 2018;44:1247-53.
30. Ishioka M, Chino A, Ide D, et al. Adding Narrow-Band Imaging to Chromoendoscopy for the Evaluation of Tumor Response to Neoadjuvant Therapy in Rectal Cancer. *Dis Colon Rectum* 2021;64:53-9.
31. Beets-Tan RGH, Lambregts DMJ, Maas M, et al. Magnetic resonance imaging for clinical management of rectal cancer: Updated recommendations from the 2016 European Society of Gastrointestinal and Abdominal Radiology (ESGAR) consensus meeting. *Eur Radiol* 2018;28:1465-75.
32. Maas M, Lambregts DM, Nelemans PJ, et al. Assessment of Clinical Complete Response After Chemoradiation for Rectal Cancer with Digital Rectal Examination, Endoscopy, and MRI: Selection for Organ-Saving Treatment. *Ann Surg Oncol* 2015;22:3873-80.
33. Simon R. Optimal two-stage designs for phase II clinical trials. *Control Clin Trials* 1989;10:1-10.

## Figure Legends

### Figure 1 Study flowchart

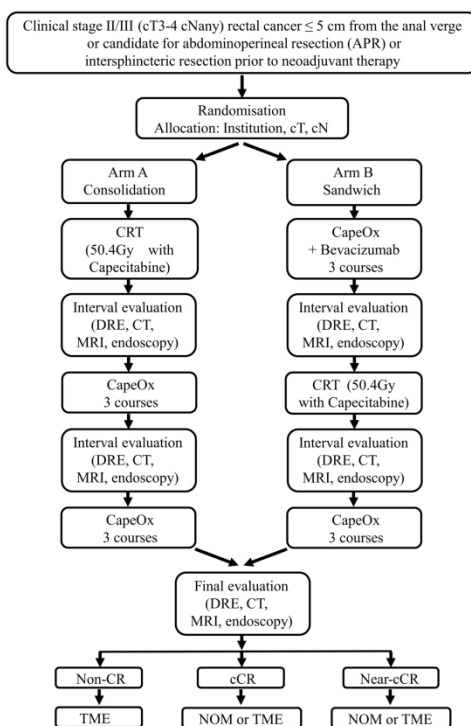

Figure 1

254x190mm (300 x 300 DPI)

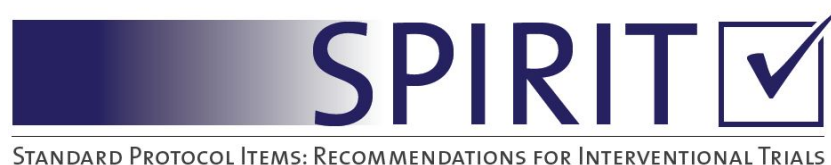

SPIRIT 2013 Checklist: Recommended items to address in a clinical trial protocol and related documents\*

| Section/item                      | Item No | Description                                                                                                                                                                                                                                                                              | Addressed on page number                  |
|-----------------------------------|---------|------------------------------------------------------------------------------------------------------------------------------------------------------------------------------------------------------------------------------------------------------------------------------------------|-------------------------------------------|
| <b>Administrative information</b> |         |                                                                                                                                                                                                                                                                                          |                                           |
| Title                             | 1       | Descriptive title identifying the study design, population, interventions, and, if applicable, trial acronym                                                                                                                                                                             | 1                                         |
| Trial registration                | 2a      | Trial identifier and registry name. If not yet registered, name of intended registry                                                                                                                                                                                                     | 4                                         |
|                                   | 2b      | All items from the World Health Organization Trial Registration Data Set                                                                                                                                                                                                                 | NS in this paper (stated in registration) |
| Protocol version                  | 3       | Date and version identifier                                                                                                                                                                                                                                                              | NS in this paper (stated in protocol)     |
| Funding                           | 4       | Sources and types of financial, material, and other support                                                                                                                                                                                                                              | 16                                        |
| Roles and responsibilities        | 5a      | Names, affiliations, and roles of protocol contributors                                                                                                                                                                                                                                  | 16                                        |
|                                   | 5b      | Name and contact information for the trial sponsor                                                                                                                                                                                                                                       | No sponsor                                |
|                                   | 5c      | Role of study sponsor and funders, if any, in study design; collection, management, analysis, and interpretation of data; writing of the report; and the decision to submit the report for publication, including whether they will have ultimate authority over any of these activities | No sponsor and funders                    |

1 5d Composition, roles, and responsibilities of the coordinating centre, steering committee, endpoint  
 2 adjudication committee, data management team, and other individuals or groups overseeing the trial, if  
 3 applicable (see Item 21a for data monitoring committee) NS in this paper  
 4 (stated in protocol)  
 5  
 6  
 7  
 8

## 9 Introduction

10  
 11 Background and 6a Description of research question and justification for undertaking the trial, including summary of relevant 5-7  
 12 rationale studies (published and unpublished) examining benefits and harms for each intervention  
 13  
 14 6b Explanation for choice of comparators 6-7  
 15  
 16 Objectives 7 Specific objectives or hypotheses 6-7  
 17  
 18 Trial design 8 Description of trial design including type of trial (eg, parallel group, crossover, factorial, single group),  
 19 allocation ratio, and framework (eg, superiority, equivalence, noninferiority, exploratory) 7  
 20  
 21

## 22 Methods: Participants, interventions, and outcomes

23  
 24 Study setting 9 Description of study settings (eg, community clinic, academic hospital) and list of countries where data will 7  
 25 be collected. Reference to where list of study sites can be obtained  
 26  
 27 Eligibility criteria 10 Inclusion and exclusion criteria for participants. If applicable, eligibility criteria for study centres and 9-10  
 28 individuals who will perform the interventions (eg, surgeons, psychotherapists)  
 29  
 30 Interventions 11a Interventions for each group with sufficient detail to allow replication, including how and when they will be 11  
 31 administered  
 32  
 33 11b Criteria for discontinuing or modifying allocated interventions for a given trial participant (eg, drug dose NS in this paper  
 34 change in response to harms, participant request, or improving/worsening disease) (stated in protocol)  
 35  
 36 11c Strategies to improve adherence to intervention protocols, and any procedures for monitoring adherence NS in this paper  
 37 (eg, drug tablet return, laboratory tests) (stated in protocol)  
 38  
 39  
 40  
 41  
 42



|    |                      |     |                                                                                                                                                                                                                                                                                                                                                                                |                                          |
|----|----------------------|-----|--------------------------------------------------------------------------------------------------------------------------------------------------------------------------------------------------------------------------------------------------------------------------------------------------------------------------------------------------------------------------------|------------------------------------------|
| 1  |                      | 11d | Relevant concomitant care and interventions that are permitted or prohibited during the trial                                                                                                                                                                                                                                                                                  | NS in this paper<br>(stated in protocol) |
| 2  |                      |     |                                                                                                                                                                                                                                                                                                                                                                                |                                          |
| 3  |                      |     |                                                                                                                                                                                                                                                                                                                                                                                |                                          |
| 4  | Outcomes             | 12  | Primary, secondary, and other outcomes, including the specific measurement variable (eg, systolic blood pressure), analysis metric (eg, change from baseline, final value, time to event), method of aggregation (eg, median, proportion), and time point for each outcome. Explanation of the clinical relevance of chosen efficacy and harm outcomes is strongly recommended | 8                                        |
| 5  |                      |     |                                                                                                                                                                                                                                                                                                                                                                                |                                          |
| 6  |                      |     |                                                                                                                                                                                                                                                                                                                                                                                |                                          |
| 7  |                      |     |                                                                                                                                                                                                                                                                                                                                                                                |                                          |
| 8  |                      |     |                                                                                                                                                                                                                                                                                                                                                                                |                                          |
| 9  | Participant timeline | 13  | Time schedule of enrolment, interventions (including any run-ins and washouts), assessments, and visits for participants. A schematic diagram is highly recommended (see Figure)                                                                                                                                                                                               | Figure 1                                 |
| 10 |                      |     |                                                                                                                                                                                                                                                                                                                                                                                |                                          |
| 11 |                      |     |                                                                                                                                                                                                                                                                                                                                                                                |                                          |
| 12 |                      |     |                                                                                                                                                                                                                                                                                                                                                                                |                                          |
| 13 | Sample size          | 14  | Estimated number of participants needed to achieve study objectives and how it was determined, including clinical and statistical assumptions supporting any sample size calculations                                                                                                                                                                                          | 10                                       |
| 14 |                      |     |                                                                                                                                                                                                                                                                                                                                                                                |                                          |
| 15 |                      |     |                                                                                                                                                                                                                                                                                                                                                                                |                                          |
| 16 | Recruitment          | 15  | Strategies for achieving adequate participant enrolment to reach target sample size                                                                                                                                                                                                                                                                                            | NS                                       |
| 17 |                      |     |                                                                                                                                                                                                                                                                                                                                                                                |                                          |

**Methods: Assignment of interventions (for controlled trials)**

Allocation:

|    |                                  |     |                                                                                                                                                                                                                                                                                                                                                          |    |
|----|----------------------------------|-----|----------------------------------------------------------------------------------------------------------------------------------------------------------------------------------------------------------------------------------------------------------------------------------------------------------------------------------------------------------|----|
| 22 |                                  |     |                                                                                                                                                                                                                                                                                                                                                          |    |
| 23 | Sequence generation              | 16a | Method of generating the allocation sequence (eg, computer-generated random numbers), and list of any factors for stratification. To reduce predictability of a random sequence, details of any planned restriction (eg, blocking) should be provided in a separate document that is unavailable to those who enrol participants or assign interventions | 11 |
| 24 |                                  |     |                                                                                                                                                                                                                                                                                                                                                          |    |
| 25 |                                  |     |                                                                                                                                                                                                                                                                                                                                                          |    |
| 26 |                                  |     |                                                                                                                                                                                                                                                                                                                                                          |    |
| 27 |                                  |     |                                                                                                                                                                                                                                                                                                                                                          |    |
| 28 | Allocation concealment mechanism | 16b | Mechanism of implementing the allocation sequence (eg, central telephone; sequentially numbered, opaque, sealed envelopes), describing any steps to conceal the sequence until interventions are assigned                                                                                                                                                | 11 |
| 29 |                                  |     |                                                                                                                                                                                                                                                                                                                                                          |    |
| 30 |                                  |     |                                                                                                                                                                                                                                                                                                                                                          |    |
| 31 |                                  |     |                                                                                                                                                                                                                                                                                                                                                          |    |
| 32 | Implementation                   | 16c | Who will generate the allocation sequence, who will enrol participants, and who will assign participants to interventions                                                                                                                                                                                                                                | 11 |
| 33 |                                  |     |                                                                                                                                                                                                                                                                                                                                                          |    |
| 34 |                                  |     |                                                                                                                                                                                                                                                                                                                                                          |    |
| 35 |                                  |     |                                                                                                                                                                                                                                                                                                                                                          |    |
| 36 | Blinding (masking)               | 17a | Who will be blinded after assignment to interventions (eg, trial participants, care providers, outcome assessors, data analysts), and how                                                                                                                                                                                                                | NA |
| 37 |                                  |     |                                                                                                                                                                                                                                                                                                                                                          |    |
| 38 |                                  |     |                                                                                                                                                                                                                                                                                                                                                          |    |
| 39 |                                  | 17b | If blinded, circumstances under which unblinding is permissible, and procedure for revealing a participant's allocated intervention during the trial                                                                                                                                                                                                     | NA |
| 40 |                                  |     |                                                                                                                                                                                                                                                                                                                                                          |    |
| 41 |                                  |     |                                                                                                                                                                                                                                                                                                                                                          |    |
| 42 |                                  |     |                                                                                                                                                                                                                                                                                                                                                          |    |

## Methods: Data collection, management, and analysis

|                         |     |                                                                                                                                                                                                                                                                                                                                                                                                              |                                       |
|-------------------------|-----|--------------------------------------------------------------------------------------------------------------------------------------------------------------------------------------------------------------------------------------------------------------------------------------------------------------------------------------------------------------------------------------------------------------|---------------------------------------|
| Data collection methods | 18a | Plans for assessment and collection of outcome, baseline, and other trial data, including any related processes to promote data quality (eg, duplicate measurements, training of assessors) and a description of study instruments (eg, questionnaires, laboratory tests) along with their reliability and validity, if known. Reference to where data collection forms can be found, if not in the protocol | NS in this paper (stated in protocol) |
|                         | 18b | Plans to promote participant retention and complete follow-up, including list of any outcome data to be collected for participants who discontinue or deviate from intervention protocols                                                                                                                                                                                                                    | NS in this paper (stated in protocol) |
| Data management         | 19  | Plans for data entry, coding, security, and storage, including any related processes to promote data quality (eg, double data entry; range checks for data values). Reference to where details of data management procedures can be found, if not in the protocol                                                                                                                                            | NS in this paper (stated in protocol) |
| Statistical methods     | 20a | Statistical methods for analysing primary and secondary outcomes. Reference to where other details of the statistical analysis plan can be found, if not in the protocol                                                                                                                                                                                                                                     | 14                                    |
|                         | 20b | Methods for any additional analyses (eg, subgroup and adjusted analyses)                                                                                                                                                                                                                                                                                                                                     | 14                                    |
|                         | 20c | Definition of analysis population relating to protocol non-adherence (eg, as randomised analysis), and any statistical methods to handle missing data (eg, multiple imputation)                                                                                                                                                                                                                              | 14                                    |

## Methods: Monitoring

|                 |     |                                                                                                                                                                                                                                                                                                                                       |                                       |
|-----------------|-----|---------------------------------------------------------------------------------------------------------------------------------------------------------------------------------------------------------------------------------------------------------------------------------------------------------------------------------------|---------------------------------------|
| Data monitoring | 21a | Composition of data monitoring committee (DMC); summary of its role and reporting structure; statement of whether it is independent from the sponsor and competing interests; and reference to where further details about its charter can be found, if not in the protocol. Alternatively, an explanation of why a DMC is not needed | 15                                    |
|                 | 21b | Description of any interim analyses and stopping guidelines, including who will have access to these interim results and make the final decision to terminate the trial                                                                                                                                                               | 14-15                                 |
| Harms           | 22  | Plans for collecting, assessing, reporting, and managing solicited and spontaneously reported adverse events and other unintended effects of trial interventions or trial conduct                                                                                                                                                     | NS in this paper (stated in protocol) |
| Auditing        | 23  | Frequency and procedures for auditing trial conduct, if any, and whether the process will be independent from investigators and the sponsor                                                                                                                                                                                           | No auditing                           |

## 1 **Ethics and dissemination**

|    |                      |     |                                                                                                                 |                      |
|----|----------------------|-----|-----------------------------------------------------------------------------------------------------------------|----------------------|
| 2  |                      |     |                                                                                                                 |                      |
| 3  | Research ethics      | 24  | Plans for seeking research ethics committee/institutional review board (REC/IRB) approval                       | 15                   |
| 4  | approval             |     |                                                                                                                 |                      |
| 5  |                      |     |                                                                                                                 |                      |
| 6  | Protocol             | 25  | Plans for communicating important protocol modifications (eg, changes to eligibility criteria, outcomes,        | NS in this paper     |
| 7  | amendments           |     | analyses) to relevant parties (eg, investigators, REC/IRBs, trial participants, trial registries, journals,     | (stated in protocol) |
| 8  |                      |     | regulators)                                                                                                     |                      |
| 9  |                      |     |                                                                                                                 |                      |
| 10 |                      |     |                                                                                                                 |                      |
| 11 | Consent or assent    | 26a | Who will obtain informed consent or assent from potential trial participants or authorised surrogates, and      | 11                   |
| 12 |                      |     | how (see Item 32)                                                                                               |                      |
| 13 |                      |     |                                                                                                                 |                      |
| 14 |                      | 26b | Additional consent provisions for collection and use of participant data and biological specimens in ancillary  | 15                   |
| 15 |                      |     | studies, if applicable                                                                                          |                      |
| 16 |                      |     |                                                                                                                 |                      |
| 17 | Confidentiality      | 27  | How personal information about potential and enrolled participants will be collected, shared, and maintained    | 11                   |
| 18 |                      |     | in order to protect confidentiality before, during, and after the trial                                         |                      |
| 19 |                      |     |                                                                                                                 |                      |
| 20 | Declaration of       | 28  | Financial and other competing interests for principal investigators for the overall trial and each study site   | 16                   |
| 21 | interests            |     |                                                                                                                 |                      |
| 22 |                      |     |                                                                                                                 |                      |
| 23 |                      |     |                                                                                                                 |                      |
| 24 | Access to data       | 29  | Statement of who will have access to the final trial dataset, and disclosure of contractual agreements that     | NS in this paper     |
| 25 |                      |     | limit such access for investigators                                                                             | (stated in protocol) |
| 26 |                      |     |                                                                                                                 |                      |
| 27 | Ancillary and post-  | 30  | Provisions, if any, for ancillary and post-trial care, and for compensation to those who suffer harm from trial | NS in this paper     |
| 28 | trial care           |     | participation                                                                                                   | (stated in protocol) |
| 29 |                      |     |                                                                                                                 |                      |
| 30 | Dissemination policy | 31a | Plans for investigators and sponsor to communicate trial results to participants, healthcare professionals,     | 15                   |
| 31 |                      |     | the public, and other relevant groups (eg, via publication, reporting in results databases, or other data       |                      |
| 32 |                      |     | sharing arrangements), including any publication restrictions                                                   |                      |
| 33 |                      |     |                                                                                                                 |                      |
| 34 |                      |     |                                                                                                                 |                      |
| 35 |                      | 31b | Authorship eligibility guidelines and any intended use of professional writers                                  | NS in this paper     |
| 36 |                      |     |                                                                                                                 | (stated in protocol) |
| 37 |                      |     |                                                                                                                 |                      |
| 38 |                      | 31c | Plans, if any, for granting public access to the full protocol, participant-level dataset, and statistical code | No plan              |
| 39 |                      |     |                                                                                                                 |                      |

## 40 **Appendices**

|   |                  |    |                                                                                                           |               |
|---|------------------|----|-----------------------------------------------------------------------------------------------------------|---------------|
| 1 | Informed consent | 32 | Model consent form and other related documentation given to participants and authorised surrogates        | Supplementary |
| 2 | materials        |    |                                                                                                           | information   |
| 3 |                  |    |                                                                                                           |               |
| 4 | Biological       | 33 | Plans for collection, laboratory evaluation, and storage of biological specimens for genetic or molecular | 15            |
| 5 | specimens        |    | analysis in the current trial and for future use in ancillary studies, if applicable                      |               |
| 6 |                  |    |                                                                                                           |               |

7 \*It is strongly recommended that this checklist be read in conjunction with the SPIRIT 2013 Explanation & Elaboration for important clarification on the items.  
8 Amendments to the protocol should be tracked and dated. The SPIRIT checklist is copyrighted by the SPIRIT Group under the Creative Commons  
9 "[Attribution-NonCommercial-NoDerivs 3.0 Unported](#)" license.  
10  
11  
12  
13  
14  
15  
16  
17  
18  
19  
20  
21  
22  
23  
24  
25  
26  
27  
28  
29  
30  
31  
32  
33  
34  
35  
36  
37  
38  
39  
40  
41  
42  
43  
44  
45  
46

# BMJ Open

**Study Protocol: Non-operative management after chemoradiotherapy plus consolidation or sandwich (induction with bevacizumab and consolidation) chemotherapy in patients with locally advanced rectal cancer: A multicentre, randomised phase II trial (NOMINATE trial)**

|                               |                                                                                                                                                                                                                                                                                                                                                                                                                                                                                                                                                                                                                                                                                                                                                                                                                                                                                                                                                                                                                                                                                                                                                                                                                                                                                                                                                                                                                                                                                                                                                                                                                                                                                                                                                                                                                                                                                                            |
|-------------------------------|------------------------------------------------------------------------------------------------------------------------------------------------------------------------------------------------------------------------------------------------------------------------------------------------------------------------------------------------------------------------------------------------------------------------------------------------------------------------------------------------------------------------------------------------------------------------------------------------------------------------------------------------------------------------------------------------------------------------------------------------------------------------------------------------------------------------------------------------------------------------------------------------------------------------------------------------------------------------------------------------------------------------------------------------------------------------------------------------------------------------------------------------------------------------------------------------------------------------------------------------------------------------------------------------------------------------------------------------------------------------------------------------------------------------------------------------------------------------------------------------------------------------------------------------------------------------------------------------------------------------------------------------------------------------------------------------------------------------------------------------------------------------------------------------------------------------------------------------------------------------------------------------------------|
| Journal:                      | <i>BMJ Open</i>                                                                                                                                                                                                                                                                                                                                                                                                                                                                                                                                                                                                                                                                                                                                                                                                                                                                                                                                                                                                                                                                                                                                                                                                                                                                                                                                                                                                                                                                                                                                                                                                                                                                                                                                                                                                                                                                                            |
| Manuscript ID                 | bmjopen-2021-055140.R2                                                                                                                                                                                                                                                                                                                                                                                                                                                                                                                                                                                                                                                                                                                                                                                                                                                                                                                                                                                                                                                                                                                                                                                                                                                                                                                                                                                                                                                                                                                                                                                                                                                                                                                                                                                                                                                                                     |
| Article Type:                 | Protocol                                                                                                                                                                                                                                                                                                                                                                                                                                                                                                                                                                                                                                                                                                                                                                                                                                                                                                                                                                                                                                                                                                                                                                                                                                                                                                                                                                                                                                                                                                                                                                                                                                                                                                                                                                                                                                                                                                   |
| Date Submitted by the Author: | 27-Jan-2022                                                                                                                                                                                                                                                                                                                                                                                                                                                                                                                                                                                                                                                                                                                                                                                                                                                                                                                                                                                                                                                                                                                                                                                                                                                                                                                                                                                                                                                                                                                                                                                                                                                                                                                                                                                                                                                                                                |
| Complete List of Authors:     | <p>Akiyoshi, Takashi; Cancer Institute Hospital Department of Gastroenterological Surgery<br/>         Shinozaki, Eiji; Cancer Institute Hospital of JFCR<br/>         Taguchi, Senzo; Cancer Institute Hospital, Department of Radiation Oncology<br/>         Chino, Akiko; Cancer Institute Hospital, Department of Gastroenterology<br/>         Hiratsuka, Makiko; Cancer Institute Hospital, Department of Diagnostic Imaging<br/>         Tominaga, Tetsuro; Nagasaki University, Department of Surgical Oncology<br/>         Nonaka, Takashi; Nagasaki University, Department of Surgical Oncology<br/>         Toda, Shigeo; Toranomon Hospital, Department of Gastroenterological Surgery<br/>         Matoba, Shuichiro; Toranomon Hospital, Department of Gastroenterological Surgery<br/>         Matsui, Shimpei; Keio University School of Medicine Graduate School of Medicine, Department of Surgery<br/>         Okabayashi, Koji ; Keio University School of Medicine Graduate School of Medicine Department of Surgery<br/>         Mukai, Toshiki; Cancer Institute Hospital Department of Gastroenterological Surgery<br/>         Hiyoshi, Yukiharu; Cancer Institute Hospital Department of Gastroenterological Surgery<br/>         Yamaguchi, Tomohiro; Cancer Institute Hospital Department of Gastroenterological Surgery<br/>         Nagasaki, Toshiya; Cancer Institute Hospital Department of Gastroenterological Surgery<br/>         Yamaguchi, Kensei; Cancer Institute Hospital<br/>         Ueno, Masashi; Toranomon Hospital, Department of Gastroenterological Surgery<br/>         Kuroyanagi, Hiroya; Toranomon Hospital, Department of Gastroenterological Surgery<br/>         Fukunaga, Yosuke; Cancer Institute Hospital Department of Gastroenterological Surgery<br/>         Ishizuka, Naoki; Cancer Institute Hospital, Department of Clinical Trial</p> |

1  
2  
3  
4  
5  
6  
7  
8  
9  
10  
11  
12  
13  
14  
15  
16  
17  
18  
19  
20  
21  
22  
23  
24  
25  
26  
27  
28  
29  
30  
31  
32  
33  
34  
35  
36  
37  
38  
39  
40  
41  
42  
43  
44  
45  
46  
47  
48  
49  
50  
51  
52  
53  
54  
55  
56  
57  
58  
59  
60

|                                                        |                                                                                                                                            |
|--------------------------------------------------------|--------------------------------------------------------------------------------------------------------------------------------------------|
|                                                        | Planning and Management<br>Konishi, Tsuyoshi; The University of Texas MD Anderson Cancer Center,<br>Department of Colon and Rectal Surgery |
| <b>&lt;b&gt;Primary Subject<br/>Heading&lt;/b&gt;:</b> | Oncology                                                                                                                                   |
| <b>Secondary Subject Heading:</b>                      | Gastroenterology and hepatology, Surgery                                                                                                   |
| <b>Keywords:</b>                                       | CHEMOTHERAPY, RADIOTHERAPY, Colorectal surgery < SURGERY                                                                                   |
|                                                        |                                                                                                                                            |

SCHOLARONE™  
Manuscripts

Akiyoshi, 1

Protocol

**Study Protocol: Non-operative management after chemoradiotherapy plus consolidation or sandwich (induction with bevacizumab and consolidation) chemotherapy in patients with locally advanced rectal cancer: A multicentre, randomised phase II trial (NOMINATE trial)**

**Takashi Akiyoshi<sup>1</sup>, Eiji Shinozaki<sup>2</sup>, Senzo Taguchi<sup>3</sup>, Akiko Chino<sup>4</sup>, Makiko Hiratsuka<sup>5</sup>, Tetsuro Tominaga<sup>6</sup>, Takashi Nonaka<sup>6</sup>, Shigeo Toda<sup>7</sup>, Shuichiro Matoba<sup>7</sup>, Shimpei Matsui<sup>8</sup>, Koji Okabayashi<sup>8</sup>, Toshiki Mukai<sup>1</sup>, Yukiharu Hiyoshi<sup>1</sup>, Tomohiro Yamaguchi<sup>1</sup>, Toshiya Nagasaki<sup>1</sup>, Kensei Yamaguchi<sup>2</sup>, Masashi Ueno<sup>7</sup>, Hiroya Kuroyanagi<sup>7</sup>, Yosuke Fukunaga<sup>1</sup>, Naoki Ishizuka<sup>9</sup>, Tsuyoshi Konishi<sup>10</sup>, for NOMINATE Collaborative Group**

<sup>1</sup>Gastroenterological Centre, Department of Gastroenterological Surgery, Cancer Institute Hospital, Japanese Foundation for Cancer Research, Tokyo, Japan

<sup>2</sup>Gastroenterological Centre, Department of Gastroenterological Chemotherapy, Cancer Institute Hospital, Japanese Foundation for Cancer Research, Tokyo, Japan

<sup>3</sup>Department of Radiation Oncology, Cancer Institute Hospital, Japanese Foundation for Cancer Research, Tokyo, Japan.

<sup>4</sup>Gastroenterological Centre, Department of Gastroenterology, Cancer Institute Hospital of the Japanese Foundation for Cancer Research, Tokyo, Japan.

<sup>5</sup>Department of Diagnostic Imaging, Cancer Institute Hospital, Japanese Foundation for Cancer Research, Tokyo, Japan.

<sup>6</sup>Department of Surgical Oncology, Nagasaki University Graduate School of Biomedical

1  
2  
3  
4 Science, Nagasaki, Japan.  
5

6 <sup>7</sup>Department of Gastroenterological Surgery, Toranomon Hospital, Tokyo, Japan.  
7

8 <sup>8</sup>Department of Surgery, Keio University School of Medicine, Tokyo, Japan  
9

10 <sup>9</sup>Department of Clinical Trial Planning and Management, Cancer Institute Hospital, Japanese  
11  
12 Foundation for Cancer Research, Tokyo, Japan.  
13  
14

15 <sup>10</sup>Department of Colon and Rectal Surgery, The University of Texas M.D. Anderson Cancer  
16  
17 Centre, Houston, Texas, USA  
18  
19

20  
21  
22  
23 **Correspondence to:** T. Akiyoshi, Gastroenterological Centre, Department of  
24  
25 Gastroenterological Surgery, Cancer Institute Hospital, Japanese Foundation for Cancer  
26  
27 Research, 3-8-31 Ariake, Koto-ku, Tokyo 135-8550, Japan  
28  
29

30 Phone: +81-03-3520-0111; fax: +81-03-3520-0141; e-mail: [takashi.akiyoshi@jfcrr.or.jp](mailto:takashi.akiyoshi@jfcrr.or.jp)  
31  
32

33  
34  
35 **Word count:** 2,475 words  
36  
37  
38  
39  
40  
41  
42  
43  
44  
45  
46  
47  
48  
49  
50  
51  
52  
53  
54  
55  
56  
57  
58  
59  
60



## ABSTRACT

**Introduction:** Total mesorectal excision (TME) and postoperative adjuvant chemotherapy following neoadjuvant chemoradiotherapy (CRT) is the standard treatment for locally advanced rectal cancer (LARC). However, neoadjuvant CRT has no recognized impact on reducing distant recurrence, and patients suffer from a long-lasting impairment in quality of life (QOL) associated with TME. Total neoadjuvant therapy (TNT) is an alternative approach that could reduce distant metastases and increase the proportion of patients who could safely undergo non-operative management (NOM). This study is designed to compare two TNT regimens in the context of NOM for selecting a more optimal regimen for patients with LARC.

**Methods and analysis:** NOMINATE trial is a prospective, multicentre, randomised phase II selection design study. Patients must have clinical stage II or III (T3-T4Nany) LARC with distal location ( $\leq 5$  cm from the anal verge or for those who are candidates for abdominoperineal resection or intersphincteric resection). Patients will be randomised to either Arm A consisting of CRT (50.4 Gy with capecitabine) followed by consolidation chemotherapy (6 cycles of CapeOx), or Arm B consisting of induction chemotherapy (3 cycles of CapeOx plus bevacizumab) followed by CRT and consolidation chemotherapy (3 cycles of CapeOx). In the case of clinical complete response (cCR) or near cCR, patients will progress to NOM. Response assessment involves a combination of digital rectal examination, endoscopy, and MRI. The primary endpoint is the proportion of patients achieving pathological CR or cCR  $\geq 2$  years, defined as the absence of local regrowth within 2 years after the start of NOM among eligible patients. Secondary endpoints include the cCR rate, near cCR rate, rate of NOM, overall survival, distant metastasis-free survival, locoregional failure-free survival, time to disease-related treatment failure, TME-free survival, permanent stoma-free survival, safety of the treatment, completion rate of the treatment, and quality of

1  
2  
3  
4 life. Allowing for a drop-out rate of 10%, 66 patients (33 per arm) from 5 institutions will be  
5  
6 accrued.

7  
8 **Ethics and dissemination:** The study protocol was approved by Wakayama Medical  
9  
10 University Certified Review Board in December 2020. Trial results will be published in peer-  
11  
12 reviewed international journals and on the jRCT website.  
13  
14

15  
16 **Trial registration number** jRCTs051200121  
17  
18

### 19 20 21 22 23 24 **Strength and limitations of this study**

- 25  
26  
27 ▶ This phase II study is the first study of total neoadjuvant therapy and non-operative  
28  
29 management to compare the efficacy and safety of consolidation chemotherapy to  
30  
31 sandwich chemotherapy using bevacizumab combined with capecitabine-based  
32  
33 chemoradiotherapy for locally advanced rectal cancer.  
34  
35
- 36  
37 ▶ This study includes clinical T3-T4NanyM0, mismatch repair-proficient rectal cancer with  
38  
39 distal location.  
40
- 41  
42 ▶ The assessment of a clinical complete response and near clinical complete response will  
43  
44 be performed based on pre-defined response criteria.  
45
- 46  
47 ▶ Patients treated with non-operative management will undergo intensive monitoring as per  
48  
49 the follow-up protocol.  
50
- 51  
52 ▶ Confirmatory conclusions cannot be drawn from this randomised phase II study with  
53  
54 relatively small sample size and a limited number of participating centres.  
55  
56  
57  
58  
59  
60

## INTRODUCTION

The current standard treatment for locally advanced rectal cancer (LARC) is neoadjuvant chemoradiotherapy (CRT), total mesorectal excision (TME), and postoperative adjuvant chemotherapy. This multimodality treatment has significantly reduced local recurrence rates to <10%. However, neoadjuvant CRT has failed to reduce distant recurrence or improve disease-free survival (DFS) and overall survival (OS). Despite the adoption of adjuvant postoperative chemotherapy, distant relapse occurs in about 30% of patients at 5 years.<sup>1</sup> The benefit of postoperative adjuvant chemotherapy following neoadjuvant CRT remains unclear, possibly due to poor compliance to chemotherapy, a longer interval between diagnosis and commencing chemotherapy, and the application of suboptimal regimens.<sup>2</sup> These limitations have led to the development of a total neoadjuvant therapy (TNT) approach, which delivers both radiotherapy and systemic chemotherapy preoperatively in an attempt to treat micrometastases earlier, increase adherence to systemic chemotherapy, and improve DFS. Two recent phase 3 randomised controlled trials investigating TNT (RAPIDO<sup>3</sup> and PRODIGE 23 trial<sup>4</sup>) showed better pathological complete response (pCR) rate and fewer distant metastases in the TNT arm as compared with the standard short-course radiotherapy or CRT arm.

Numerous studies have shown that patients with a pCR have more favourable long-term oncological outcomes in terms of distant and local control,<sup>5</sup> and this has raised the question as to whether TME can be avoided in patients with pCR. Because TME is associated with postoperative complications and late morbidity, such as bowel, sexual, and urinary dysfunction,<sup>6,7</sup> avoiding TME may provide an opportunity to reduce the morbidity and the need of a permanent stoma, and improve quality of life (QOL). In 2004, Habr-Gama et al. for the first time proposed a watch-and-wait (WW) approach or non-operative management

(NOM) for patients with a clinical complete response (cCR) after CRT.<sup>8</sup> Since then, many studies—mainly retrospective observational studies—have shown NOM to be a feasible option for patients with cCR after CRT.<sup>9,10</sup>

TNT has the potential to increase the proportion of patients achieving cCR and thus being eligible for NOM;<sup>11</sup> however, randomised trial data evaluating the efficacy of NOM in the context of TNT are lacking. OPRA was the first randomised phase II trial to address the efficacy of TNT and NOM for patients with cCR or near cCR, with the primary endpoint of 3-year DFS, as compared with standard historical controls managed with CRT and TME followed by adjuvant chemotherapy.<sup>12</sup> In the OPRA trial, 306 patients with LARC were randomised to receive 4 months of 5-Fluorouracil (5-FU), Leucovorin and Oxaliplatin (FOLFOX) or Capecitabine and Oxaliplatin (CapeOx) either before (induction chemotherapy) or after (consolidation chemotherapy) CRT, followed by NOM for patients with cCR or near cCR. Preliminary analyses demonstrated higher 3-year organ preservation rates in the consolidation arm over the induction arm (59% vs 43%).<sup>13</sup> Similarly, in the CAO/ARO/AIO-12 phase II trial, which randomly assigned patients to either induction or consolidation chemotherapy (3 cycles of FOLFOX) before or after oxaliplatin-based CRT followed by TME, demonstrated higher pCR rates in the consolidation arm as compared with the induction arm (25% vs 17%).<sup>14</sup> Given these results, CRT followed by consolidation chemotherapy may enable greater organ preservation, and should be preferentially considered.<sup>15</sup>

On the other hand, several studies have shown that the addition of anti-vascular endothelial growth factor (VEGF) drugs before radiotherapy can enhance the radiation response in LARC.<sup>16,17</sup> In the GEMCAD 1402 randomised phase II trial of induction chemotherapy with 3 months of mFOLFOX6 with or without aflibercept followed by CRT

Akiyoshi, 7

1  
2  
3  
4 and TME, patients in the aflibercept arm demonstrated a higher pCR rate than those without  
5  
6 aflibercept (22.6% vs 13.8%).<sup>18</sup> In a single-arm phase II trial of 3 months of mFOLFOX6  
7  
8 plus bevacizumab prior to CRT, we reported a pCR rate of 37% with favourable toxicity in a  
9  
10 series of 43 patients with poor-risk LARC.<sup>19</sup> Furthermore, a single-arm phase II study of  
11  
12 sandwich-like neoadjuvant therapy consisting of one cycle of induction FOLFOX with  
13  
14 bevacizumab, followed by CRT with three doses of bevacizumab, and one cycle of  
15  
16 consolidation FOLFOX, also reported a high pCR rate (39.1%).<sup>20</sup> Given these results, we  
17  
18 hypothesized that sandwich-like therapy of 3 cycles of induction chemotherapy with  
19  
20 bevacizumab and 3 cycles of consolidation chemotherapy could provide the advantages of  
21  
22 both induction (addressing micrometastatic disease earlier and enhanced CRT response by  
23  
24 bevacizumab) and consolidation (greater pCR or NOM rate) therapy arms. We chose long-  
25  
26 course CRT because there was limited data on the use of short-course radiotherapy in  
27  
28 NOM.<sup>21</sup>

29  
30  
31  
32  
33  
34  
35 To this end, we designed this randomised phase II trial (NOMINATE trial) of TNT  
36  
37 and NOM to compare the efficacy and safety of consolidation chemotherapy (6 cycles of  
38  
39 CapeOx) to a sandwich chemotherapy regimen using bevacizumab (3 cycles of CapeOx plus  
40  
41 bevacizumab as induction chemotherapy and 3 cycles of CapeOx as consolidation  
42  
43 chemotherapy) combined with capecitabine-based CRT.  
44  
45  
46  
47  
48  
49  
50  
51

## 52 **METHODS AND ANALYSIS**

### 53 **Study design**

54  
55  
56  
57 This is a prospective, multicentre, randomised phase II selection design study to compare two  
58  
59 TNT regimens in the context of NOM for selecting a more optimal regimen for patients with  
60

1  
2  
3  
4 LARC. The study flowchart is shown in Figure 1.  
5  
6  
7

### 8 **Primary endpoint**

9  
10  
11 The primary endpoint is the proportion of patients achieving pCR or cCR  $\geq 2$  years among  
12  
13 eligible patients. pCR is defined as no residual tumor cells in the surgical specimen. cCR  $\geq 2$   
14  
15 years is defined as the absence of local regrowth within 2 years after the start of NOM.  
16  
17  
18

### 19 **Secondary endpoints**

20  
21  
22  
23 Secondary endpoints include cCR rate, near cCR rate, rate of NOM, OS, distant metastasis-  
24  
25 free survival, locoregional failure-free survival, time to disease-related treatment failure,  
26  
27 TME-free survival, permanent stoma-free survival, safety of the treatment, completion rate of  
28  
29 the treatment, faecal incontinence according to Wexner score<sup>22</sup> and Low Anterior Resection  
30  
31 Syndrome (LARS)-scale<sup>23</sup>, and quality of life according to European Organization for  
32  
33 Research and Treatment of Cancer Quality of Life Questionnaire (EORTC QLQ) - C30<sup>24</sup> and  
34  
35 CR29<sup>25</sup>. Locoregional failure includes progressive unresectable disease, local R2 resection,  
36  
37 and intrapelvic recurrence after TME. Local regrowth after NOM is not considered as  
38  
39 locoregional failure when followed by an R0/R1 resection. Disease-related treatment failure  
40  
41 is defined as the first occurrence of locoregional failure, distant metastasis, a new primary  
42  
43 colorectal cancer, or treatment-related death.<sup>3</sup> In patients managed by TME, surgical  
44  
45 morbidity, R0 resection rate, pathological stage, Dworak tumour regression grade<sup>26</sup> will also  
46  
47 be assessed. In patients managed by NOM, local regrowth rate, time to local regrowth,  
48  
49 salvage surgery rate in patients with local regrowth, surgical morbidity in salvage surgery,  
50  
51 and R0 resection rate in salvage surgery will also be assessed. The grade of adverse events  
52  
53 will be assessed according to Common Terminology Criteria for Adverse Events (CTCAE)  
54  
55  
56  
57  
58  
59  
60

V.5.0.

### **Eligibility criteria**

#### **Inclusion criteria**

1. Histologically confirmed diagnosis of adenocarcinoma of the rectum.
2. The lowest part of the tumor  $\leq 5$  cm from the anal verge or patient is a candidate for abdominoperineal resection or intersphincteric resection prior to neoadjuvant therapy according to the primary surgeon.
3. Patients must have clinical stage II (cT3-4N0) or stage III (cT3-4N1-3) by MRI and CT.
4. ECOG PS 0 or 1.
5. Age  $\geq 20$  years.
6. Adequate organ functions within 28 days prior to entry: neutrophils  $\geq 1,500$  /mm<sup>3</sup>, platelets  $\geq 10 \times 10^4$  /mm<sup>3</sup>, haemoglobin  $\geq 9.0$  g/dL, total bilirubin  $\leq 2.0$  mg/dL, aspartate aminotransferase  $\leq 100$  IU/L, alanine aminotransferase  $\leq 100$  IU/L, serum creatinine  $\leq 1.5$  mg/dL or Ccr  $\geq 60$  mL/min/body, urine protein/creatinine  $< 1$ .
7. If there is bowel obstruction or significant stricture, stoma is constructed prior to neoadjuvant therapy.
8. Written informed consent is obtained.

#### **Exclusion criteria**

1. Patients with a history of a prior malignancy within the past 5 years, except for adequately treated cancer with 5-year relative survival rate  $\geq 95\%$ .
2. History of pelvic irradiation.
3. Administration contraindication of capecitabine, oxaliplatin, or bevacizumab.

4. Uncontrolled active infection.
5. Body temperature  $\geq 38$  °C at registration.
6. Possibly pregnant, pregnant, or nursing.
7. Patients with concurrent psychiatric condition or disease that would make them inappropriate candidates for entry into this study in the investigator's judgement.
8. Patients with concurrent serious comorbidity (heart failure, interstitial lung disease or pulmonary fibrosis, uncontrolled diabetes, renal failure, liver failure, hypertension, thrombotic disease, gastrointestinal fistula, among other similarly serious conditions).
9. History of operation  $\leq 4$  weeks ago or minor operation such as stoma construction  $\leq 2$  weeks ago.
10. Deficient in mismatch repair (dMMR), as determined by immunohistochemistry and/or microsatellite instability testing using pre-treatment biopsy specimens.
11. Other conditions not suitable for this study in the investigator's judgement.

### Sample size calculation

This study uses a "pick the winner" format proposed by Simon et al.<sup>27</sup> The expected lowest response rate of pCR or cCR  $\geq 2$  years is set at 25%.<sup>28</sup> If the difference in response rate between the treatment arms is at least 10%, 30 patients per arm (total 60 patients) is necessary to select the better treatment with a probability of  $\geq 80\%$ . With consideration for dropouts of 10%, 33 patients per arm (total 66 patients) will be necessary. If there are no differences in response rate between treatment arms, a better treatment will be chosen in terms of secondary endpoints such as toxicity and safety of the treatment.

### Registration and randomization



1  
2  
3  
4 Patients are registered to the study after confirming the eligibility criteria and written  
5  
6 informed consent is obtained. Patients are requested to fill out EORTC QLQ-C30, CR29, and  
7  
8 a questionnaire about faecal incontinence (Wexner score and LARS scale) at registration.  
9

10  
11 After registration, patients are randomly assigned at a 1:1 ratio to the consolidation arm (arm  
12  
13 A) or sandwich arm (arm B) using a minimization method stratified by institution, cT (cT3 vs  
14  
15 cT4), and cN (cN- vs cN+). Registration, randomization, and collection of patient information  
16  
17 will be performed using the Viedoc electronic data capture (EDC) system. Data are  
18  
19 anonymized using a unique patient identification number.  
20  
21  
22  
23  
24  
25

## 26 **Treatment**

27  
28 Arm A consists of CRT (50.4 Gy in 28 fractions and capecitabine 825mg/m<sup>2</sup> bid, day 1-5, 8-  
29  
30 12, 15-19, 22-26, 29-33, 36-38) followed by consolidation chemotherapy (6 cycles of  
31  
32 CapeOx: capecitabine 2000 mg/m<sup>2</sup>/day, days 1-14, oxaliplatin 130 mg/m<sup>2</sup>, day 1, Q3w).  
33  
34

35 Consolidation chemotherapy should start at 3-8 weeks after the last day of radiotherapy. Arm  
36  
37 B consists of induction chemotherapy (3 cycles of CapeOx plus bevacizumab: capecitabine  
38  
39 2000 mg/m<sup>2</sup>/day, days 1-14, oxaliplatin 130 mg/m<sup>2</sup>, day1, bevacizumab 7.5 mg/kg, day 1,  
40  
41 Q3w) followed by CRT (same as in Arm A) followed by consolidation chemotherapy (3  
42  
43 cycles of CapeOx). CRT should start at 3-6 weeks after the last day of induction  
44  
45 chemotherapy, and consolidation chemotherapy should start at 3-8 weeks after the last day of  
46  
47 radiotherapy.  
48  
49  
50  
51  
52  
53  
54

## 55 **Response assessment**

56  
57 Interval evaluation will be performed twice: after the completion of CRT and after the  
58  
59 completion of 3 cycles of consolidation chemotherapy in Arm A, and after the completion of  
60

induction chemotherapy and after the completion of CRT in Arm B. Final response assessment will be performed at 4 (- 1/+ 4) weeks after the completion of all neoadjuvant treatments. In the case of cCR or near cCR, patients will progress to NOM, but TME is also permitted if patients hope to undergo radical surgery. In the case of non-CR, patients will progress to TME. Criteria for response assessment are shown in Table 1.<sup>12,29-32</sup> Final response assessment involves a combination of digital rectal examination, endoscopy, and MRI, and will be discussed at online multidisciplinary-team meetings attended by the principal investigator (PI) and the local investigators.

Table 1 Criteria for response assessment

|           |      |                                   | <b>cCR</b>                                                                                                 | <b>Near cCR</b>                       | <b>Non-CR</b>                                                                                    |
|-----------|------|-----------------------------------|------------------------------------------------------------------------------------------------------------|---------------------------------------|--------------------------------------------------------------------------------------------------|
| Endoscopy | WL-C | Ulcer                             | Closed                                                                                                     | Closed                                | Open                                                                                             |
|           |      | Scar                              | Linear and flat (white)                                                                                    | Irregular surface (reddish)           | Incompletely closed ulcer, residual erosion or white moss                                        |
|           |      | Protruded tumor nodule            | No                                                                                                         | No                                    | Yes                                                                                              |
|           | ME   | Wall extension                    | Normal                                                                                                     | Decreased                             | Poor with submucosal tumor-like deformity                                                        |
|           |      | Vessel pattern (NBI)              | Regular circulated/lacy                                                                                    | Lack of uniformity                    | Calibre change/irregularity                                                                      |
|           |      | Surface pattern (Chromoendoscopy) | Uniformly arranged regeneration pits                                                                       | Regenerated pits irregularly arranged | Residual neoplastic pit pattern                                                                  |
| DRE       |      | Normal                            | Smooth induration or minor mucosal abnormalities                                                           | Tumor nodules palpable                |                                                                                                  |
| MRI       | T2WI | Tumor bed                         | Normalized rectal wall or no residual intermediate signal in the tumor bed and fibrotic hypointense signal |                                       | Residual intermediate tumor signal (regardless of the percentage of fibrotic hypointense signal) |
|           |      | Lymph node                        | Downsizing of involved lymph nodes to a short-axis diameter <5 mm                                          |                                       | Partial or no regression of involved lymph nodes with a short-axis diameter ≥5 mm                |

|                                     |           |                                                                                    |                                                                                             |
|-------------------------------------|-----------|------------------------------------------------------------------------------------|---------------------------------------------------------------------------------------------|
| DWI<br>(b800 or<br>b1000<br>images) | Tumor bed | No high signal on high b-value images<br>and no low ADC signal in the tumor<br>bed | Presence of high signal<br>on high b-value images<br>and low ADC signal in<br>the tumor bed |
|-------------------------------------|-----------|------------------------------------------------------------------------------------|---------------------------------------------------------------------------------------------|

*cCR* clinical complete response, *near cCR* near clinical complete response, *Non-CR* non-complete response, *WL-C* White light conventional endoscopy, *ME* magnifying endoscopy, *NBI* narrow-band imaging, *DRE* digital rectal examination, *T2WI* T2-weighted images, *DWI* diffusion-weighted images, *ADC* apparent diffusion coefficient.

## Follow-up

Patients treated with TME will be followed with measurements of serum carcinoembryonic antigen (CEA) and carbohydrate (CA) 19-9 and will be subjected to chest/abdomen/pelvis CT scan every 6 months for 5 years. Patients treated with NOM will be followed every 3 months for the first 2 years and every 6 months thereafter, as shown in Table 2. In the case of near *cCR*, patients will be followed every 6-8 weeks for the first 6 months. Salvage TME will be recommended for patients with local regrowth after NOM; if the patient refuses TME, local resection will also be acceptable. If a patient refuses surgical resection of local regrowth, it is considered as locoregional failure.

Table 2 Follow-up protocol for non-operative management

| Time from final response | Tumor marker | DRE | MRI <sup>b</sup> | CT <sup>c</sup> | Endoscopy | Adverse events | PROM <sup>d</sup> |
|--------------------------|--------------|-----|------------------|-----------------|-----------|----------------|-------------------|
| 3 months <sup>e</sup>    | x            | x   | x                |                 | Rectum    | x              |                   |
| 6 months                 | x            | x   | x                | x               | Rectum    | x              | x                 |
| 9 months                 | x            | x   | x                |                 | Rectum    | x              |                   |
| 1 year                   | x            | x   | x                | x               | Total     | x              | x                 |
| 1 year 3 months          | x            | x   | x                |                 | Rectum    | x              |                   |
| 1 year 6 months          | x            | x   | x                | x               | Rectum    | x              |                   |
| 1 year 9 months          | x            | x   | x                |                 | Rectum    | x              |                   |
| 2 years                  | x            | x   | x                | x               | Rectum    | x              | x                 |
| 2 years 6 months         | x            | x   | x                | x               | Rectum    | x              |                   |
| 3 years                  | x            | x   | x                | x               | Total     | x              | x                 |
| 3 years 6 months         | x            | x   | x                | x               | Rectum    | x              |                   |
| 4 years                  | x            | x   | x                | x               | Rectum    | x              |                   |
| 4 years 6 months         | x            | x   | x                | x               | Rectum    | x              |                   |
| 5 years                  | x            | x   | x                | x               | Total     | x              |                   |

<sup>a</sup>Tumor marker includes serum carcinoembryonic antigen (CEA) and carbohydrate (CA) 19-9.

<sup>b</sup>MRI includes pelvic MRI

<sup>c</sup>CT includes chest/abdomen/pelvis CT

<sup>d</sup>PROM includes EORTC QLQ - C30 and CR29, Wexner score, and LARS-scale

<sup>e</sup>Near cCR patients will be followed every 6-8 weeks for the first 6 months

*DRE* digital rectal examination, *MRI* magnetic resonance imaging, *CT* computed tomography, *PROM* patient-reported outcome measure

### Statistical analysis plan

The primary analysis will be conducted when 3 years have passed since patient accrual completion. All analyses are based on descriptive data without testing because of the study design. The proportions at the primary endpoint will be estimated using an Clopper-Pearson method for binomial response. The proportions among registered patients or patients who complete the protocol treatment will also be calculated as a reference. An analysis of secondary endpoints will also be performed to complement the results at the primary endpoint, but adjustment of multiplicity will not be performed due to their exploratory nature. Kaplan–Meier method will be used to estimate OS, with 95% CIs calculated by Greenwood’s formula. Univariate Cox regression will be used to estimate HRs with 95% CIs associated with treatment arms. For endpoints with competing risk, such as distant metastasis-free survival, locoregional failure-free survival and an estimation of HRs will be performed using Fine and Grey models. The final analysis will be conducted when 6 years have passed since patient accrual completion.

### Interim analysis and monitoring

Interim analysis is planned for possible early trial termination to claim futility. In Simon’s optimal two-stage design,<sup>33</sup> when the null hypothesis is a pCR or cCR/near cCR rate of 15% versus the alternative of 30% for each arm, and power and one-sided alpha are set at 80% and

1  
2  
3  
4 5%, respectively, 19 subjects will be accrued in the first stage. If there are 3 or fewer  
5  
6 responders within these 19 subjects, enrolment in that arm will be stopped. If the number of  
7  
8 treatment-related deaths reach two for each arm, the registration will be suspended until Data  
9  
10 and Safety Monitoring approve the continuation of the trial. The Data Centre (Clinical  
11  
12 Research and Medical Development Centre, Cancer Institute Hospital, Japanese Foundation  
13  
14 for Cancer Research) will perform central monitoring every 6 months and monitoring reports  
15  
16 will be submitted to the Data and Safety Monitoring Committee.  
17  
18  
19  
20  
21  
22

### 23 **Translational research**

24  
25 Accompanying translational research about the molecular determinants of response to TNT  
26  
27 and molecular predictors of successful organ preservation is planned. The specific study  
28  
29 protocol for correlative translational research to the NOMINATE trial has been approved by  
30  
31 the intuitional review boards of all participating institutions. Tumour tissue and plasma will  
32  
33 be collected and stored at different time points after obtaining written informed consent from  
34  
35 patients. Next-generation sequencing, such as exome sequencing, RNA sequencing, and  
36  
37 circulating tumour DNA analysis, will be performed.  
38  
39  
40  
41  
42  
43  
44

### 45 **Ethics and dissemination**

46  
47 Wakayama Medical University Certified Review Board approved this study protocol in  
48  
49 December 2020. The first patient was enrolled in March 2021, and the estimated study  
50  
51 completion date is November 2030. This trial will be performed in accordance with the  
52  
53 Declaration of Helsinki and Clinical Trials Act in Japan. Trial results of the primary and  
54  
55 secondary endpoints will be published in peer-reviewed international journals and on the  
56  
57 jRCT website (<https://jrct.niph.go.jp/>), as well as at international and national conferences.  
58  
59  
60

## Patient and public involvement

Patients or the public were not involved in the design, or conduct, or reporting, or dissemination plans of this study.

**Contributors** TA, ES, ST and TK developed the trial concept, wrote the protocol, and drafted the manuscript. NI designed the statistical analyses for the study. AC, MH, TT, TN, ST, SM, SM, KO, TM, YH, TY, TN, KY, MU, HK and YF have made substantial contributions to the conception and design of the work and subsequent protocol revisions. TA submitted the study.

**Funding** This trial receives no specific grant from any funding agency in the public, commercial or not-for-profit sectors at present.

**Competing interests** KY reports honoraria from Chugai Co., Ltd.

**Patient consent for publication** Not required.

**Ethics approval** Wakayama Medical University Certified Review Board (CRB5180004).

## References

1. Breugom AJ, Swets M, Bosset JF, et al. Adjuvant chemotherapy after preoperative (chemo)radiotherapy and surgery for patients with rectal cancer: a systematic review and meta-analysis of individual patient data. *Lancet Oncol* 2015;16:200-7.
2. Carvalho C, Glynne-Jones R. Challenges behind proving efficacy of adjuvant chemotherapy after preoperative chemoradiation for rectal cancer. *Lancet Oncol* 2017;18:e354-e63.
3. Bahadoer RR, Dijkstra EA, van Etten B, et al. Short-course radiotherapy followed by chemotherapy before total mesorectal excision (TME) versus preoperative chemoradiotherapy, TME, and optional adjuvant chemotherapy in locally advanced rectal cancer (RAPIDO): a randomised, open-label, phase 3 trial. *Lancet Oncol* 2021;22:29-42.
4. Conroy T, Bosset JF, Etienne PL, et al. Neoadjuvant chemotherapy with FOLFIRINOX and preoperative chemoradiotherapy for patients with locally advanced rectal cancer (UNICANCER-PRODIGE 23): a multicentre, randomised, open-label, phase 3 trial.

1  
2  
3  
4  
5  
6  
7  
8  
9  
10  
11  
12  
13  
14  
15  
16  
17  
18  
19  
20  
21  
22  
23  
24  
25  
26  
27  
28  
29  
30  
31  
32  
33  
34  
35  
36  
37  
38  
39  
40  
41  
42  
43  
44  
45  
46  
47  
48  
49  
50  
51  
52  
53  
54  
55  
56  
57  
58  
59  
60

*Lancet Oncol* 2021;22:702-15.

5. Maas M, Nelemans PJ, Valentini V, et al. Long-term outcome in patients with a pathological complete response after chemoradiation for rectal cancer: a pooled analysis of individual patient data. *Lancet Oncol* 2010;11:835-44.
6. Matsubara N, Miyata H, Gotoh M, et al. Mortality after common rectal surgery in Japan: a study on low anterior resection from a newly established nationwide large-scale clinical database. *Dis Colon Rectum* 2014;57:1075-81.
7. Honda M, Akiyoshi T, Noma H, et al. Patient-centered outcomes to decide treatment strategy for patients with low rectal cancer. *J Surg Oncol* 2016;114:630-6.
8. Habr-Gama A, Perez RO, Nadalin W, et al. Operative versus nonoperative treatment for stage 0 distal rectal cancer following chemoradiation therapy: long-term results. *Ann Surg* 2004;240:711-7.
9. van der Valk MJM, Hilling DE, Bastiaannet E, et al. Long-term outcomes of clinical complete responders after neoadjuvant treatment for rectal cancer in the International Watch & Wait Database (IWWD): an international multicentre registry study. *Lancet* 2018;391:2537-45.
10. Renehan AG, Malcomson L, Emsley R, et al. Watch-and-wait approach versus surgical resection after chemoradiotherapy for patients with rectal cancer (the OnCoRe project): a propensity-score matched cohort analysis. *Lancet Oncol* 2016;17:174-83.
11. Cercek A, Roxburgh CSD, Strombom P, et al. Adoption of Total Neoadjuvant Therapy for Locally Advanced Rectal Cancer. *JAMA Oncol* 2018;4:e180071.
12. Smith JJ, Chow OS, Gollub MJ, et al. Organ Preservation in Rectal Adenocarcinoma: a phase II randomized controlled trial evaluating 3-year disease-free survival in patients with locally advanced rectal cancer treated with chemoradiation plus induction or consolidation chemotherapy, and total mesorectal excision or nonoperative management. *BMC Cancer* 2015;15:767.
13. Garcia-Aguilar J, Patil S, Kim JK, et al. Preliminary results of the organ preservation of rectal adenocarcinoma (OPRA) trial. *J Clin Oncol* 2020;38(15\_suppl):4008.
14. Fokas E, Allgäuer M, Polat B, et al. Randomized Phase II Trial of Chemoradiotherapy Plus Induction or Consolidation Chemotherapy as Total Neoadjuvant Therapy for Locally Advanced Rectal Cancer: CAO/ARO/AIO-12. *J Clinical Oncol* 2019;37:3212-22.
15. Shi DD, Mamon HJ. Playing With Dynamite? A Cautious Assessment of TNT. *J Clin Oncol* 2021;39:103-6.
16. Zhou Y, Guo Z, Wu Z, et al. The efficacy and safety of adding bevacizumab in neoadjuvant therapy for locally advanced rectal cancer patients: A systematic review and meta-analysis. *Transl Oncol* 2021;14:100964.
17. Zhong X, Wu Z, Gao P, et al. The efficacy of adding targeted agents to neoadjuvant therapy for locally advanced rectal cancer patients: a meta-analysis. *Cancer Med* 2018;7:565-82.
18. Fernández-Martos C, Pericay C, Losa F, et al. Effect of Aflibercept Plus Modified FOLFOX6 Induction Chemotherapy Before Standard Chemoradiotherapy and Surgery in Patients With High-Risk Rectal Adenocarcinoma: The GEMCAD 1402 Randomized Clinical Trial. *JAMA Oncol* 2019;5:1566-73.
19. Konishi T, Shinozaki E, Murofushi K, et al. Phase II Trial of Neoadjuvant Chemotherapy, Chemoradiotherapy, and Laparoscopic Surgery with Selective Lateral Node Dissection for Poor-Risk Low Rectal Cancer. *Ann Surg Oncol* 2019;26:2507-13.

20. Xiao J, Chen Z, Li W, et al. Sandwich-like neoadjuvant therapy with bevacizumab for locally advanced rectal cancer: a phase II trial. *Cancer Chemother Pharmacol* 2015;76:21-7.
21. Yuval JB, Thompson HM, Garcia-Aguilar J. Organ Preservation in Rectal Cancer. *J Gastrointest Surg* 2020;24:1880-8.
22. Jorge JM, Wexner SD. Etiology and management of fecal incontinence. *Dis Colon Rectum* 1993;36:77-97.
23. Emmertsen KJ, Laurberg S. Low anterior resection syndrome score: development and validation of a symptom-based scoring system for bowel dysfunction after low anterior resection for rectal cancer. *Ann Surg* 2012;255:922-8.
24. Aaronson NK, Ahmedzai S, Bergman B, et al. The European Organization for Research and Treatment of Cancer QLQ-C30: a quality-of-life instrument for use in international clinical trials in oncology. *J Natl Cancer Inst* 1993;85:365-76.
25. Whistance RN, Conroy T, Chie W, et al. Clinical and psychometric validation of the EORTC QLQ-CR29 questionnaire module to assess health-related quality of life in patients with colorectal cancer. *Eur J Cancer* 2009;45:3017-26.
26. Dworak O, Keilholz L, Hoffmann A. Pathological features of rectal cancer after preoperative radiochemotherapy. *Int J Colorectal Dis* 1997;12:19-23.
27. Simon R, Wittes RE, Ellenberg SS. Randomized phase II clinical trials. *Cancer Treat Rep* 1985;69:1375-81.
28. Petrelli F, Trevisan F, Cabiddu M, et al. Total Neoadjuvant Therapy in Rectal Cancer: A Systematic Review and Meta-analysis of Treatment Outcomes. *Ann Surg* 2019;271:440-448
29. Chino A, Konishi T, Ogura A, et al. Endoscopic criteria to evaluate tumor response of rectal cancer to neoadjuvant chemoradiotherapy using magnifying chromoendoscopy. *Eur J Surg Oncol* 2018;44:1247-53.
30. Ishioka M, Chino A, Ide D, et al. Adding Narrow-Band Imaging to Chromoendoscopy for the Evaluation of Tumor Response to Neoadjuvant Therapy in Rectal Cancer. *Dis Colon Rectum* 2021;64:53-9.
31. Beets-Tan RGH, Lambregts DMJ, Maas M, et al. Magnetic resonance imaging for clinical management of rectal cancer: Updated recommendations from the 2016 European Society of Gastrointestinal and Abdominal Radiology (ESGAR) consensus meeting. *Eur Radiol* 2018;28:1465-75.
32. Maas M, Lambregts DM, Nelemans PJ, et al. Assessment of Clinical Complete Response After Chemoradiation for Rectal Cancer with Digital Rectal Examination, Endoscopy, and MRI: Selection for Organ-Saving Treatment. *Ann Surg Oncol* 2015;22:3873-80.
33. Simon R. Optimal two-stage designs for phase II clinical trials. *Control Clin Trials* 1989;10:1-10.

## Figure Legends

### Figure 1 Study flowchart



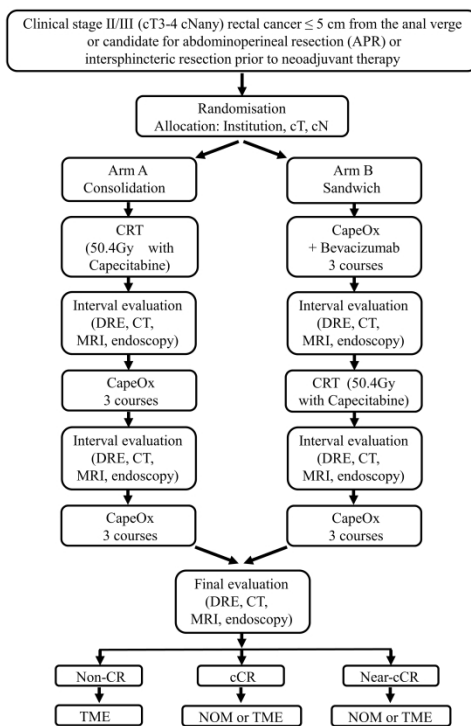

Figure 1

254x190mm (600 x 600 DPI)



SPIRIT 2013 Checklist: Recommended items to address in a clinical trial protocol and related documents\*

| Section/item                      | Item No | Description                                                                                                                                                                                                                                                                              | Addressed on page number                  |
|-----------------------------------|---------|------------------------------------------------------------------------------------------------------------------------------------------------------------------------------------------------------------------------------------------------------------------------------------------|-------------------------------------------|
| <b>Administrative information</b> |         |                                                                                                                                                                                                                                                                                          |                                           |
| Title                             | 1       | Descriptive title identifying the study design, population, interventions, and, if applicable, trial acronym                                                                                                                                                                             | 1                                         |
| Trial registration                | 2a      | Trial identifier and registry name. If not yet registered, name of intended registry                                                                                                                                                                                                     | 4                                         |
|                                   | 2b      | All items from the World Health Organization Trial Registration Data Set                                                                                                                                                                                                                 | NS in this paper (stated in registration) |
| Protocol version                  | 3       | Date and version identifier                                                                                                                                                                                                                                                              | NS in this paper (stated in protocol)     |
| Funding                           | 4       | Sources and types of financial, material, and other support                                                                                                                                                                                                                              | 16                                        |
| Roles and responsibilities        | 5a      | Names, affiliations, and roles of protocol contributors                                                                                                                                                                                                                                  | 16                                        |
|                                   | 5b      | Name and contact information for the trial sponsor                                                                                                                                                                                                                                       | No sponsor                                |
|                                   | 5c      | Role of study sponsor and funders, if any, in study design; collection, management, analysis, and interpretation of data; writing of the report; and the decision to submit the report for publication, including whether they will have ultimate authority over any of these activities | No sponsor and funders                    |

1 5d Composition, roles, and responsibilities of the coordinating centre, steering committee, endpoint  
 2 adjudication committee, data management team, and other individuals or groups overseeing the trial, if  
 3 applicable (see Item 21a for data monitoring committee) NS in this paper  
 4 (stated in protocol)  
 5  
 6  
 7  
 8

## 9 Introduction

10  
 11 Background and 6a Description of research question and justification for undertaking the trial, including summary of relevant 5-7  
 12 rationale studies (published and unpublished) examining benefits and harms for each intervention  
 13  
 14 6b Explanation for choice of comparators 6-7  
 15  
 16 Objectives 7 Specific objectives or hypotheses 6-7  
 17  
 18 Trial design 8 Description of trial design including type of trial (eg, parallel group, crossover, factorial, single group),  
 19 allocation ratio, and framework (eg, superiority, equivalence, noninferiority, exploratory) 7  
 20  
 21

## 22 Methods: Participants, interventions, and outcomes

23  
 24 Study setting 9 Description of study settings (eg, community clinic, academic hospital) and list of countries where data will 7  
 25 be collected. Reference to where list of study sites can be obtained  
 26  
 27 Eligibility criteria 10 Inclusion and exclusion criteria for participants. If applicable, eligibility criteria for study centres and 9-10  
 28 individuals who will perform the interventions (eg, surgeons, psychotherapists)  
 29  
 30 Interventions 11a Interventions for each group with sufficient detail to allow replication, including how and when they will be 11  
 31 administered  
 32  
 33 11b Criteria for discontinuing or modifying allocated interventions for a given trial participant (eg, drug dose NS in this paper  
 34 change in response to harms, participant request, or improving/worsening disease) (stated in protocol)  
 35  
 36 11c Strategies to improve adherence to intervention protocols, and any procedures for monitoring adherence NS in this paper  
 37 (eg, drug tablet return, laboratory tests) (stated in protocol)  
 38  
 39  
 40  
 41  
 42

|    |                      |     |                                                                                                                                                                                                                                                                                                                                                                                |                                          |
|----|----------------------|-----|--------------------------------------------------------------------------------------------------------------------------------------------------------------------------------------------------------------------------------------------------------------------------------------------------------------------------------------------------------------------------------|------------------------------------------|
| 1  |                      | 11d | Relevant concomitant care and interventions that are permitted or prohibited during the trial                                                                                                                                                                                                                                                                                  | NS in this paper<br>(stated in protocol) |
| 2  |                      |     |                                                                                                                                                                                                                                                                                                                                                                                |                                          |
| 3  |                      |     |                                                                                                                                                                                                                                                                                                                                                                                |                                          |
| 4  | Outcomes             | 12  | Primary, secondary, and other outcomes, including the specific measurement variable (eg, systolic blood pressure), analysis metric (eg, change from baseline, final value, time to event), method of aggregation (eg, median, proportion), and time point for each outcome. Explanation of the clinical relevance of chosen efficacy and harm outcomes is strongly recommended | 8                                        |
| 5  |                      |     |                                                                                                                                                                                                                                                                                                                                                                                |                                          |
| 6  |                      |     |                                                                                                                                                                                                                                                                                                                                                                                |                                          |
| 7  |                      |     |                                                                                                                                                                                                                                                                                                                                                                                |                                          |
| 8  |                      |     |                                                                                                                                                                                                                                                                                                                                                                                |                                          |
| 9  | Participant timeline | 13  | Time schedule of enrolment, interventions (including any run-ins and washouts), assessments, and visits for participants. A schematic diagram is highly recommended (see Figure)                                                                                                                                                                                               | Figure 1                                 |
| 10 |                      |     |                                                                                                                                                                                                                                                                                                                                                                                |                                          |
| 11 |                      |     |                                                                                                                                                                                                                                                                                                                                                                                |                                          |
| 12 |                      |     |                                                                                                                                                                                                                                                                                                                                                                                |                                          |
| 13 | Sample size          | 14  | Estimated number of participants needed to achieve study objectives and how it was determined, including clinical and statistical assumptions supporting any sample size calculations                                                                                                                                                                                          | 10                                       |
| 14 |                      |     |                                                                                                                                                                                                                                                                                                                                                                                |                                          |
| 15 |                      |     |                                                                                                                                                                                                                                                                                                                                                                                |                                          |
| 16 | Recruitment          | 15  | Strategies for achieving adequate participant enrolment to reach target sample size                                                                                                                                                                                                                                                                                            | NS                                       |
| 17 |                      |     |                                                                                                                                                                                                                                                                                                                                                                                |                                          |

**Methods: Assignment of interventions (for controlled trials)**

Allocation:

|    |                                  |     |                                                                                                                                                                                                                                                                                                                                                          |    |
|----|----------------------------------|-----|----------------------------------------------------------------------------------------------------------------------------------------------------------------------------------------------------------------------------------------------------------------------------------------------------------------------------------------------------------|----|
| 22 |                                  |     |                                                                                                                                                                                                                                                                                                                                                          |    |
| 23 | Sequence generation              | 16a | Method of generating the allocation sequence (eg, computer-generated random numbers), and list of any factors for stratification. To reduce predictability of a random sequence, details of any planned restriction (eg, blocking) should be provided in a separate document that is unavailable to those who enrol participants or assign interventions | 11 |
| 24 |                                  |     |                                                                                                                                                                                                                                                                                                                                                          |    |
| 25 |                                  |     |                                                                                                                                                                                                                                                                                                                                                          |    |
| 26 |                                  |     |                                                                                                                                                                                                                                                                                                                                                          |    |
| 27 |                                  |     |                                                                                                                                                                                                                                                                                                                                                          |    |
| 28 | Allocation concealment mechanism | 16b | Mechanism of implementing the allocation sequence (eg, central telephone; sequentially numbered, opaque, sealed envelopes), describing any steps to conceal the sequence until interventions are assigned                                                                                                                                                | 11 |
| 29 |                                  |     |                                                                                                                                                                                                                                                                                                                                                          |    |
| 30 |                                  |     |                                                                                                                                                                                                                                                                                                                                                          |    |
| 31 |                                  |     |                                                                                                                                                                                                                                                                                                                                                          |    |
| 32 | Implementation                   | 16c | Who will generate the allocation sequence, who will enrol participants, and who will assign participants to interventions                                                                                                                                                                                                                                | 11 |
| 33 |                                  |     |                                                                                                                                                                                                                                                                                                                                                          |    |
| 34 |                                  |     |                                                                                                                                                                                                                                                                                                                                                          |    |
| 35 |                                  |     |                                                                                                                                                                                                                                                                                                                                                          |    |
| 36 | Blinding (masking)               | 17a | Who will be blinded after assignment to interventions (eg, trial participants, care providers, outcome assessors, data analysts), and how                                                                                                                                                                                                                | NA |
| 37 |                                  |     |                                                                                                                                                                                                                                                                                                                                                          |    |
| 38 |                                  |     |                                                                                                                                                                                                                                                                                                                                                          |    |
| 39 |                                  | 17b | If blinded, circumstances under which unblinding is permissible, and procedure for revealing a participant's allocated intervention during the trial                                                                                                                                                                                                     | NA |
| 40 |                                  |     |                                                                                                                                                                                                                                                                                                                                                          |    |
| 41 |                                  |     |                                                                                                                                                                                                                                                                                                                                                          |    |
| 42 |                                  |     |                                                                                                                                                                                                                                                                                                                                                          |    |

## Methods: Data collection, management, and analysis

|                         |     |                                                                                                                                                                                                                                                                                                                                                                                                              |                                       |
|-------------------------|-----|--------------------------------------------------------------------------------------------------------------------------------------------------------------------------------------------------------------------------------------------------------------------------------------------------------------------------------------------------------------------------------------------------------------|---------------------------------------|
| Data collection methods | 18a | Plans for assessment and collection of outcome, baseline, and other trial data, including any related processes to promote data quality (eg, duplicate measurements, training of assessors) and a description of study instruments (eg, questionnaires, laboratory tests) along with their reliability and validity, if known. Reference to where data collection forms can be found, if not in the protocol | NS in this paper (stated in protocol) |
|                         | 18b | Plans to promote participant retention and complete follow-up, including list of any outcome data to be collected for participants who discontinue or deviate from intervention protocols                                                                                                                                                                                                                    | NS in this paper (stated in protocol) |
| Data management         | 19  | Plans for data entry, coding, security, and storage, including any related processes to promote data quality (eg, double data entry; range checks for data values). Reference to where details of data management procedures can be found, if not in the protocol                                                                                                                                            | NS in this paper (stated in protocol) |
| Statistical methods     | 20a | Statistical methods for analysing primary and secondary outcomes. Reference to where other details of the statistical analysis plan can be found, if not in the protocol                                                                                                                                                                                                                                     | 14                                    |
|                         | 20b | Methods for any additional analyses (eg, subgroup and adjusted analyses)                                                                                                                                                                                                                                                                                                                                     | 14                                    |
|                         | 20c | Definition of analysis population relating to protocol non-adherence (eg, as randomised analysis), and any statistical methods to handle missing data (eg, multiple imputation)                                                                                                                                                                                                                              | 14                                    |

## Methods: Monitoring

|                 |     |                                                                                                                                                                                                                                                                                                                                       |                                       |
|-----------------|-----|---------------------------------------------------------------------------------------------------------------------------------------------------------------------------------------------------------------------------------------------------------------------------------------------------------------------------------------|---------------------------------------|
| Data monitoring | 21a | Composition of data monitoring committee (DMC); summary of its role and reporting structure; statement of whether it is independent from the sponsor and competing interests; and reference to where further details about its charter can be found, if not in the protocol. Alternatively, an explanation of why a DMC is not needed | 15                                    |
|                 | 21b | Description of any interim analyses and stopping guidelines, including who will have access to these interim results and make the final decision to terminate the trial                                                                                                                                                               | 14-15                                 |
| Harms           | 22  | Plans for collecting, assessing, reporting, and managing solicited and spontaneously reported adverse events and other unintended effects of trial interventions or trial conduct                                                                                                                                                     | NS in this paper (stated in protocol) |
| Auditing        | 23  | Frequency and procedures for auditing trial conduct, if any, and whether the process will be independent from investigators and the sponsor                                                                                                                                                                                           | No auditing                           |

## Ethics and dissemination

|    |                      |     |                                                                                                                 |                      |
|----|----------------------|-----|-----------------------------------------------------------------------------------------------------------------|----------------------|
| 1  |                      |     |                                                                                                                 |                      |
| 2  |                      |     |                                                                                                                 |                      |
| 3  | Research ethics      | 24  | Plans for seeking research ethics committee/institutional review board (REC/IRB) approval                       | 15                   |
| 4  | approval             |     |                                                                                                                 |                      |
| 5  |                      |     |                                                                                                                 |                      |
| 6  | Protocol             | 25  | Plans for communicating important protocol modifications (eg, changes to eligibility criteria, outcomes,        | NS in this paper     |
| 7  | amendments           |     | analyses) to relevant parties (eg, investigators, REC/IRBs, trial participants, trial registries, journals,     | (stated in protocol) |
| 8  |                      |     | regulators)                                                                                                     |                      |
| 9  |                      |     |                                                                                                                 |                      |
| 10 |                      |     |                                                                                                                 |                      |
| 11 | Consent or assent    | 26a | Who will obtain informed consent or assent from potential trial participants or authorised surrogates, and      | 11                   |
| 12 |                      |     | how (see Item 32)                                                                                               |                      |
| 13 |                      |     |                                                                                                                 |                      |
| 14 |                      | 26b | Additional consent provisions for collection and use of participant data and biological specimens in ancillary  | 15                   |
| 15 |                      |     | studies, if applicable                                                                                          |                      |
| 16 |                      |     |                                                                                                                 |                      |
| 17 | Confidentiality      | 27  | How personal information about potential and enrolled participants will be collected, shared, and maintained    | 11                   |
| 18 |                      |     | in order to protect confidentiality before, during, and after the trial                                         |                      |
| 19 |                      |     |                                                                                                                 |                      |
| 20 | Declaration of       | 28  | Financial and other competing interests for principal investigators for the overall trial and each study site   | 16                   |
| 21 | interests            |     |                                                                                                                 |                      |
| 22 |                      |     |                                                                                                                 |                      |
| 23 |                      |     |                                                                                                                 |                      |
| 24 | Access to data       | 29  | Statement of who will have access to the final trial dataset, and disclosure of contractual agreements that     | NS in this paper     |
| 25 |                      |     | limit such access for investigators                                                                             | (stated in protocol) |
| 26 |                      |     |                                                                                                                 |                      |
| 27 | Ancillary and post-  | 30  | Provisions, if any, for ancillary and post-trial care, and for compensation to those who suffer harm from trial | NS in this paper     |
| 28 | trial care           |     | participation                                                                                                   | (stated in protocol) |
| 29 |                      |     |                                                                                                                 |                      |
| 30 | Dissemination policy | 31a | Plans for investigators and sponsor to communicate trial results to participants, healthcare professionals,     | 15                   |
| 31 |                      |     | the public, and other relevant groups (eg, via publication, reporting in results databases, or other data       |                      |
| 32 |                      |     | sharing arrangements), including any publication restrictions                                                   |                      |
| 33 |                      |     |                                                                                                                 |                      |
| 34 |                      |     |                                                                                                                 |                      |
| 35 |                      | 31b | Authorship eligibility guidelines and any intended use of professional writers                                  | NS in this paper     |
| 36 |                      |     |                                                                                                                 | (stated in protocol) |
| 37 |                      |     |                                                                                                                 |                      |
| 38 |                      | 31c | Plans, if any, for granting public access to the full protocol, participant-level dataset, and statistical code | No plan              |
| 39 |                      |     |                                                                                                                 |                      |

## Appendices

|   |                  |    |                                                                                                           |               |
|---|------------------|----|-----------------------------------------------------------------------------------------------------------|---------------|
| 1 | Informed consent | 32 | Model consent form and other related documentation given to participants and authorised surrogates        | Supplementary |
| 2 | materials        |    |                                                                                                           | information   |
| 3 |                  |    |                                                                                                           |               |
| 4 | Biological       | 33 | Plans for collection, laboratory evaluation, and storage of biological specimens for genetic or molecular | 15            |
| 5 | specimens        |    | analysis in the current trial and for future use in ancillary studies, if applicable                      |               |
| 6 |                  |    |                                                                                                           |               |

7 \*It is strongly recommended that this checklist be read in conjunction with the SPIRIT 2013 Explanation & Elaboration for important clarification on the items.  
8 Amendments to the protocol should be tracked and dated. The SPIRIT checklist is copyrighted by the SPIRIT Group under the Creative Commons  
9 "[Attribution-NonCommercial-NoDerivs 3.0 Unported](#)" license.  
10  
11  
12  
13  
14  
15  
16  
17  
18  
19  
20  
21  
22  
23  
24  
25  
26  
27  
28  
29  
30  
31  
32  
33  
34  
35  
36  
37  
38  
39  
40  
41  
42  
43  
44  
45  
46

For peer review only
